# Supplementary material
Source: PubMed Central journal article supplement (PMC3773500)
Supplement: NIHMS494182-supplement-1.pdf [file NIHMS494182-supplement-1.pdf]

## Supplementary information

### The CRAPome: a Contaminant Repository for Affinity Purification Mass Spectrometry Data

D. Mellacheruvu, Z. Wright, A. L. Couzens, J.-P. Lambert, N. St-Denis, T. Li, Y. V. Miteva, S. Hauri, M. E. Sardi, T. Y. Low, V. A. Halim, R. D. Bagshaw, N. C. Hubner, A. al-Hakim, A. Bouchard, D. Faubert, D. Fermin, W. H. Dunham, M. Goudreault, Z.-Y. Lin, B. Gonzalez Badillo, T. Pawson, D. Durocher, B. Coulombe, R. Aebersold, G. Superti-Furga, J. Colinge, A. J. R. Heck, H. Choi, M. Gstaiger, S. Mohammed, I. M. Cristea, K. L. Bennett, M. P. Washburn, B. Raught, R. M. Ewing, A.-C. Gingras\* and A. I. Nesvizhskii\*

\*Address correspondence to: [gingras@lunenfeld.ca](mailto:gingras@lunenfeld.ca), [nesvi@med.umich.edu](mailto:nesvi@med.umich.edu)

### Supplementary Figures

Supplementary Figure 1: Database schema page 2

Supplementary Figure 2: Effect of SAINT options on the results page 3

The number of interactions in iRefIndex is shown in relation to the different sets of SAINT options employed for the analysis of the four bait benchmark test data. The options tested here were minFold (on/off) and norm (on/off). As described in Choi et al., *Current Protocols in Bioinformatics*, 2012, as well as in the Supplementary Note, minFold “on” forces a separation between the true and false distributions, and norm “on” normalizes the data in relation to the total number of identified spectra in the sample. Both of these options allow for conservative scoring, but they may induce a loss in sensitivity. Systematically testing different parameters allows for a more enlightened selection of the optimal parameters for SAINT filtering in a particular dataset. Here, we found that turning minFold “off” while keeping norm “on” performed slightly better; this is due to the fact that some true interaction partners for MEPCE and EIF4A2 are found at reduced levels in the control runs.

### Supplementary Tables

Supplementary Table 1: Controlled vocabularies and values in the CRAPome page 4

Supplementary Table 2: List of the most frequently detected proteins across the entire dataset (*H. sapiens*); reduced list. Only the top entries are shown; see “Supplementary data” section on the [www.crapome.org](http://www.crapome.org) for full list. page 5

Supplementary Table 3: List of the most frequently detected proteins across the entire dataset (*H. sapiens*); redundant list. Only the top entries are shown; see “Supplementary data” section on the [www.crapome.org](http://www.crapome.org) for full list. page 10

Supplementary Table 4: List of the most enriched GO biological process (level 3) categories (*H. sapiens*) page 15

Supplementary Table 5: List of the most enriched GO molecular function (level 3) categories (*H. sapiens*) page 16

Supplementary Table 6: List of the most enriched GO cellular component (level 3) categories (*H. sapiens*) page 17

### Supplementary Notes

Supplementary Note 1: User Manual page 18

Supplementary Note 2: Annotator Manual page 29

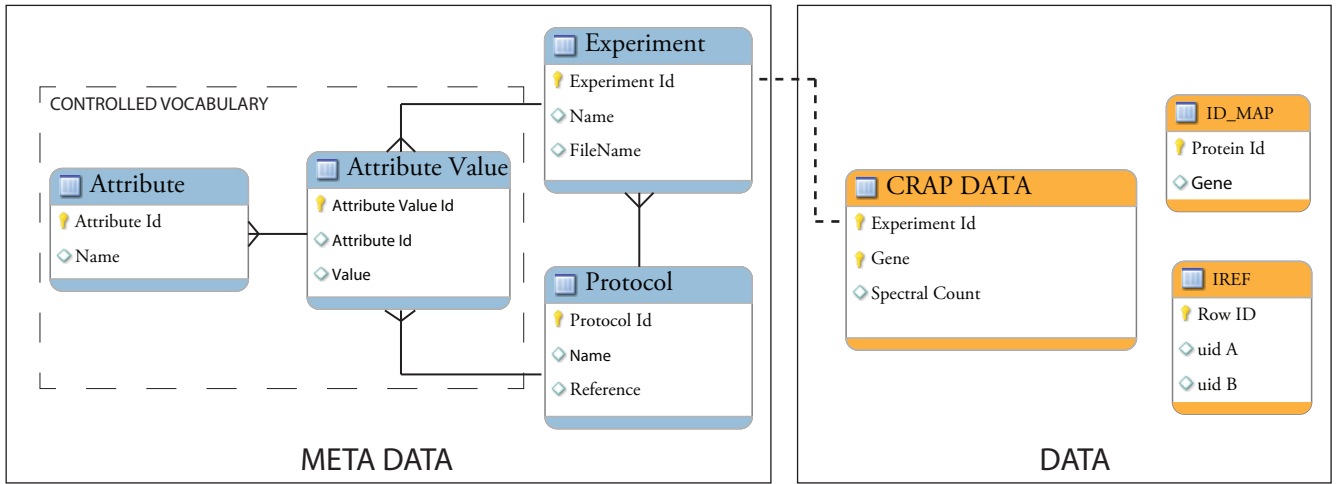

**Supplementary Figure 1: Database schema**

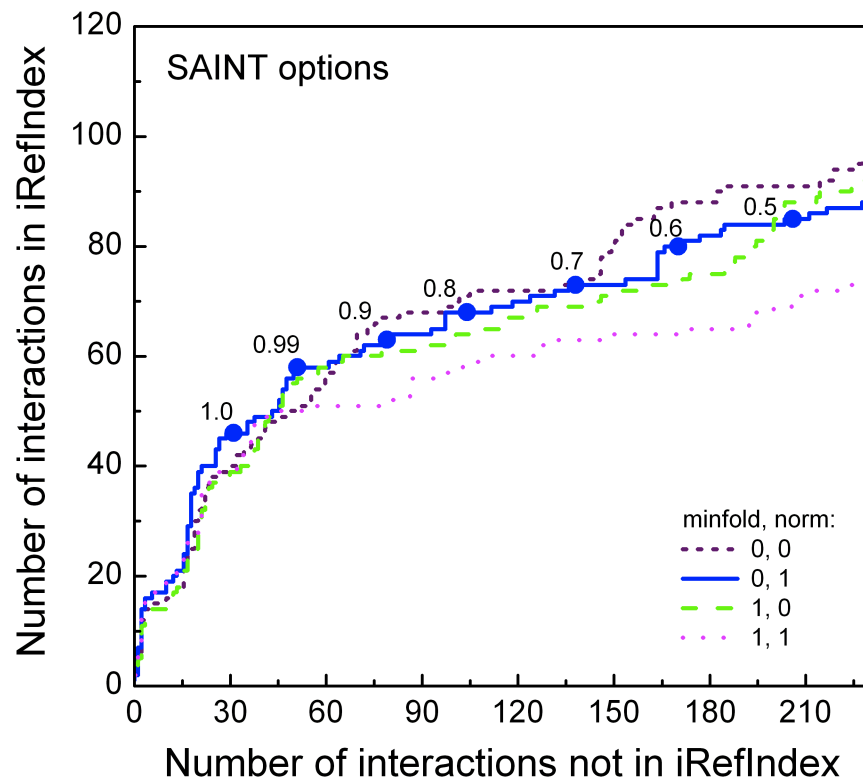

### Supplementary Figure 2: Effect of SAINT options on the results.

The number of interactions in iRefIndex is shown in relation to the different sets of SAINT options employed for the analysis of the four bait benchmark test data. The options tested here were minFold (on/off) and norm (on/off). As described in Choi et al., *Current Protocols in Bioinformatics*, 2012, as well as on the tutorial, minFold “on” forces a separation between the true and false distributions, and norm “on” normalizes the data in relation to the total number of identified spectra in the sample. Both of these options allow for conservative scoring, but they may induce a loss in sensitivity. Systematically testing different parameters allows for a more enlightened selection of the optimal parameters for SAINT filtering in a particular dataset. Here, we found that turning minFold “off” while keeping norm “on” performed slightly better; this is due to the fact that some true interaction partners for MEPCE and EIF4A2 are found at reduced levels in the control runs.

Supplementary Table 1: Controlled vocabularies and values in the CRAPome

| Attribute Name            | Attribute Values                                                                                                                                   |
|---------------------------|----------------------------------------------------------------------------------------------------------------------------------------------------|
| Organism                  | H. sapiens, S. cerevisiae                                                                                                                          |
| Cell/tissue type          | HEK293, HeLa, U2OS, PBMC, Jurkat, CEM-T, MRC-5, LS174, S288C                                                                                       |
| Cell/tissue subtype       | HEK293T, HEK293 Flp-In T-REx, Jurkat-Flp-In                                                                                                        |
| Drug treatment            | aphidicolin, rapamycin, nocodazole, MG132, none, IFN-beta, DMSO, okadaic acid, doxycycline+thymidine, tetracycline+thymidine, thymidine+nocodazole |
| Subcellular fractionation | total cell lysate, total lysate+chromatin, nuclear fraction, cytosolic fraction                                                                    |
| Epitope tag               | FLAG, HA, GFP, TAP, HaloTag, Strep-HA                                                                                                              |
| Control protein           | RFP, GFP, FLAG, mCherry, tag alone, untransfected, uninduced, NLS-RFP                                                                              |
| AP steps                  | single, tandem                                                                                                                                     |
| Affinity approach 1       | M2 anti-FLAG, anti-GFP camel, anti-GFP rabbit, HA-7 anti-HA, HaloLink, IgG, Streptactin, 2xFLAG, SBP, anti-GFP mouse, HA.11 anti-HA                |
| Affinity support 1        | agarose, magnetic (dynabead), magnetic (agarose coated), nano-magnetic, microMACS                                                                  |
| Affinity approach 2       | M2 anti-FLAG, anti-GFP camel, anti-GFP rabbit, calmodulin, HA, 2xHA, HA-7 anti-HA, anti-GFP mouse                                                  |
| Affinity support 2        | agarose, magnetic bead (dynabead), magnetic beads, agarose coated, nano-magnetic beads, microMACS                                                  |
| Fractionation             | SDS-PAGE, 1D LC-MS, MudPIT, RP-RP, GeLC                                                                                                            |
| Instrument type           | Velos-Orbitrap, LTQ-Orbitrap, LTQ, LCQ, LTQ-FT, 5600 TripleTOF                                                                                     |

**Supplementary Table 2: Most frequently detected genes in the CRAPome (reduced list - see Methods).** Full Table online at [www.crapome.org](http://www.crapome.org). This list was processed using ABACUS

Columns are as follows: PROTID, RefSeq protein accession used for mapping in ABACUS; GENEID, Universal Gene Symbol; Num Expt Total, number of experiments in which the gene product was identified; Frequency, the percentage of the experiments in the CRAPome in which the gene product was identified; Max SC, the maximum number of spectral counts with which one gene product was identified across all CRAPome experiments; Ave SC, the average number of spectral counts for the gene product across all experiments; Sum SC, the total spectral counts across the entire CRAPome; Sum SC (unique), the total spectral counts unambiguously assigned to the protein.

| PROTID         | GENEID     | Num Expt Total | Frequency | Max SC | Ave SC | Sum SC | Sum SC (unique) |
|----------------|------------|----------------|-----------|--------|--------|--------|-----------------|
| NP_005336.3    | HSPA1A     | 334            | 0.97      | 385    | 39.89  | 13641  | 5355            |
| NP_005518.3    | HSPA1L     | 330            | 0.96      | 215    | 20.67  | 7065   | 4               |
| NP_006588.1    | HSPA8      | 330            | 0.96      | 395    | 35.92  | 12287  | 9630            |
| NP_006112.3    | KRT1       | 325            | 0.95      | 1424   | 87.44  | 29294  | 28989           |
| NP_068814.2    | HSPA2      | 322            | 0.94      | 185    | 14.66  | 5001   | 2399            |
| NP_006073.2    | TUBA1B     | 321            | 0.94      | 366    | 33.99  | 11642  | 11642           |
| NP_116093.1    | TUBA1C     | 321            | 0.94      | 333    | 32.13  | 11001  | 11001           |
| NP_002146.2    | HSPA6      | 318            | 0.93      | 173    | 12.33  | 4220   | 312             |
| NP_005992.1    | TUBA3C     | 318            | 0.93      | 287    | 24.88  | 8519   | 8519            |
| NP_821133.1    | TUBB       | 317            | 0.92      | 355    | 33.15  | 11358  | 11358           |
| NP_005991.1    | TUBA4A     | 313            | 0.91      | 284    | 23.69  | 8109   | 8109            |
| NP_006079.1    | TUBB4B     | 313            | 0.91      | 330    | 26.84  | 9308   | 9308            |
| NP_001060.1    | TUBB2A     | 309            | 0.90      | 319    | 23.83  | 8160   | 8160            |
| NP_821080.1    | TUBB2B     | 309            | 0.90      | 321    | 24.04  | 8231   | 8231            |
| NP_005338.1    | HSPA5      | 306            | 0.89      | 120    | 12.99  | 4422   | 3237            |
| NP_000414.2    | KRT2       | 303            | 0.88      | 723    | 44.41  | 15183  | 13080           |
| NP_001092.1    | ACTB       | 302            | 0.88      | 831    | 35.38  | 12120  | 12120           |
| NP_006077.2    | TUBB3      | 302            | 0.88      | 175    | 17.36  | 5945   | 5945            |
| NP_006078.2    | TUBB4A     | 302            | 0.88      | 264    | 19.51  | 6798   | 6798            |
| NP_000412.3    | KRT10      | 301            | 0.88      | 960    | 68.89  | 23584  | 22390           |
| NP_001091.1    | ACTA1      | 295            | 0.86      | 426    | 19.07  | 6532   | 6532            |
| NP_001135417.1 | ACTA2      | 293            | 0.85      | 344    | 17.27  | 5912   | 5912            |
| NP_001393.1    | EEF1A1     | 290            | 0.85      | 168    | 14.92  | 5109   | 1980            |
| NP_001077007.1 | POTEE      | 288            | 0.84      | 302    | 12.10  | 4148   | 4148            |
| NP_000217.2    | KRT9       | 287            | 0.84      | 834    | 49.04  | 16809  | 16552           |
| NP_001949.1    | EEF1A2     | 283            | 0.83      | 113    | 9.17   | 3142   | 13              |
| NP_005546.2    | KRT6B      | 278            | 0.81      | 383    | 20.57  | 7015   | 5053            |
| NP_778253.2    | KRT77      | 274            | 0.80      | 182    | 6.93   | 2353   | 1952            |
| NP_001017992.1 | ACTBL2     | 266            | 0.78      | 171    | 8.27   | 2829   | 2829            |
| NP_115914.1    | TUBB6      | 258            | 0.75      | 103    | 8.71   | 2985   | 2985            |
| NP_000517.2    | KRT14      | 255            | 0.74      | 356    | 20.46  | 7000   | 5806            |
| NP_005545.1    | KRT6A      | 255            | 0.74      | 259    | 17.38  | 5908   | 3946            |
| NP_005548.2    | KRT16      | 251            | 0.73      | 310    | 17.96  | 6152   | 4958            |
| NP_004125.3    | HSPA9      | 249            | 0.73      | 185    | 10.43  | 3545   | 3538            |
| NP_000415.2    | KRT5       | 244            | 0.71      | 279    | 19.22  | 6547   | 4585            |
| NP_005310.1    | HIST1H1C   | 240            | 0.70      | 93     | 6.63   | 2251   | 87              |
| NP_005312.1    | HIST1H1E   | 239            | 0.70      | 93     | 6.60   | 2249   | 84              |
| NP_005311.1    | HIST1H1D   | 239            | 0.70      | 91     | 6.31   | 2141   | 1               |
| NP_002267.2    | KRT19      | 233            | 0.68      | 181    | 8.77   | 3002   | 1666            |
| NP_853515.2    | KRT27      | 231            | 0.67      | 199    | 6.54   | 2235   | 2235            |
| NP_004684.2    | KRT75      | 230            | 0.67      | 104    | 7.85   | 2658   | 997             |
| NP_000413.1    | KRT17      | 228            | 0.66      | 159    | 11.35  | 3880   | 2643            |
| NP_001035807.1 | HIST2H2AA4 | 223            | 0.65      | 234    | 7.34   | 2507   | 2507            |
| NP_002131.2    | HNRNPK     | 223            | 0.65      | 161    | 8.79   | 3012   | 3012            |
| NP_002266.2    | KRT15      | 223            | 0.65      | 130    | 7.98   | 2723   | 1529            |
| NP_003504.2    | HIST1H2AB  | 223            | 0.65      | 234    | 7.09   | 2423   | 2423            |
| NP_001129064.1 | RPS27A     | 222            | 0.65      | 108    | 4.13   | 1413   | 1413            |
| NP_787028.1    | KRT79      | 221            | 0.64      | 112    | 6.78   | 2297   | 11              |

|                |           |     |      |     |       |      |      |
|----------------|-----------|-----|------|-----|-------|------|------|
| NP_004492.2    | HNRNPU    | 220 | 0.64 | 286 | 10.27 | 3498 | 8    |
| NP_114032.2    | HNRNPU    | 220 | 0.64 | 286 | 10.41 | 3543 | 53   |
| NP_002264.1    | KRT8      | 218 | 0.64 | 592 | 11.59 | 3921 | 3062 |
| NP_705694.2    | KRT13     | 216 | 0.63 | 147 | 8.37  | 2858 | 1921 |
| NP_031381.2    | HSP90AB1  | 215 | 0.63 | 328 | 16.69 | 5306 | 2620 |
| NP_000215.1    | KRT18     | 213 | 0.62 | 365 | 8.37  | 2850 | 1732 |
| NP_001029102.1 | UBA52     | 211 | 0.62 | 108 | 4.00  | 1371 | 1371 |
| NP_056932.2    | KRT76     | 211 | 0.62 | 97  | 6.99  | 2351 | 1038 |
| NP_001017963.2 | HSP90AA1  | 210 | 0.61 | 256 | 15.62 | 5028 | 2561 |
| NP_003371.2    | VIM       | 209 | 0.61 | 861 | 24.16 | 8260 | 8075 |
| NP_002127.1    | HNRNPA1   | 207 | 0.60 | 54  | 4.76  | 1622 | 1571 |
| NP_000996.2    | RPS3      | 206 | 0.60 | 65  | 7.02  | 2397 | 2397 |
| NP_112533.1    | HNRNPA2B1 | 205 | 0.60 | 69  | 6.72  | 2267 | 2216 |
| NP_005372.2    | NCL       | 202 | 0.59 | 126 | 8.02  | 2741 | 2741 |
| NP_001020241.1 | RPS14     | 201 | 0.59 | 41  | 2.57  | 880  | 880  |
| NP_005511.1    | HNRNPH1   | 200 | 0.58 | 223 | 9.18  | 3142 | 1041 |
| NP_072045.1    | RPS18     | 199 | 0.58 | 45  | 3.49  | 1182 | 1182 |
| NP_001189360.1 | PRDX1     | 198 | 0.58 | 53  | 3.79  | 1279 | 803  |
| NP_002037.2    | GAPDH     | 198 | 0.58 | 113 | 5.95  | 2034 | 1985 |
| NP_000969.1    | RPL23     | 196 | 0.57 | 52  | 2.97  | 1014 | 1014 |
| NP_002263.3    | KRT4      | 193 | 0.56 | 61  | 3.14  | 1046 | 729  |
| NP_002645.3    | PKM       | 191 | 0.56 | 194 | 8.96  | 3064 | 3064 |
| NP_001165335.1 | TUBAL3    | 189 | 0.55 | 25  | 2.10  | 716  | 716  |
| NP_002511.1    | NPM1      | 189 | 0.55 | 122 | 4.25  | 1442 | 1442 |
| NP_004550.2    | YBX1      | 189 | 0.55 | 112 | 4.00  | 1365 | 1365 |
| NP_001027565.1 | HNRNPH2   | 188 | 0.55 | 91  | 4.52  | 1539 | 170  |
| NP_004387.1    | DDX5      | 188 | 0.55 | 97  | 4.89  | 1662 | 896  |
| NP_002096.1    | H2AFX     | 186 | 0.54 | 157 | 4.43  | 1513 | 1513 |
| NP_000998.1    | RPS4X     | 185 | 0.54 | 68  | 5.51  | 1874 | 1874 |
| NP_001091974.1 | DDX17     | 183 | 0.53 | 93  | 4.87  | 1654 | 888  |
| NP_000975.2    | RPL23A    | 182 | 0.53 | 39  | 2.95  | 1006 | 1006 |
| NP_066402.2    | HIST1H2BJ | 180 | 0.52 | 184 | 9.03  | 3088 | 3088 |
| NP_778235.1    | HIST2H2AB | 180 | 0.52 | 57  | 2.66  | 909  | 909  |
| NP_000968.2    | RPL13     | 179 | 0.52 | 60  | 3.06  | 1044 | 1044 |
| NP_005316.1    | HIST1H1A  | 179 | 0.52 | 44  | 2.52  | 851  | 30   |
| NP_005314.2    | HIST1H1T  | 178 | 0.52 | 38  | 2.24  | 770  | 1    |
| NP_001091674.1 | HNRNPF    | 177 | 0.52 | 62  | 4.29  | 1464 | 416  |
| NP_001143.2    | SLC25A5   | 176 | 0.51 | 73  | 3.78  | 1290 | 1290 |
| NP_002147.2    | HSPD1     | 174 | 0.51 | 177 | 6.57  | 2236 | 2236 |
| NP_005959.2    | HNRNPM    | 174 | 0.51 | 179 | 8.88  | 3018 | 3018 |
| NP_001029249.1 | HIST2H4B  | 172 | 0.50 | 332 | 8.52  | 2923 | 2923 |
| NP_001203.1    | C1QBP     | 171 | 0.50 | 425 | 5.15  | 1760 | 1760 |
| NP_002268.2    | KRT31     | 171 | 0.50 | 106 | 3.58  | 1222 | 285  |
| NP_000995.1    | RPLP2     | 170 | 0.50 | 134 | 3.46  | 1189 | 1189 |
| NP_001003.1    | RPS8      | 169 | 0.49 | 57  | 3.62  | 1237 | 1237 |
| NP_001019.1    | RPS25     | 168 | 0.49 | 19  | 2.14  | 721  | 721  |
| NP_476429.2    | KRT3      | 167 | 0.49 | 82  | 5.15  | 1726 | 533  |
| NP_001104026.1 | FLNA      | 166 | 0.48 | 332 | 13.65 | 4651 | 4651 |
| NP_444513.1    | DCD       | 164 | 0.48 | 50  | 2.28  | 780  | 780  |
| NP_001138880.1 | NONO      | 162 | 0.47 | 438 | 9.29  | 3146 | 2952 |
| NP_001419.1    | ENO1      | 162 | 0.47 | 177 | 8.21  | 2707 | 457  |
| NP_000972.1    | RPL19     | 160 | 0.47 | 71  | 1.97  | 668  | 668  |
| NP_002129.2    | HNRNPD    | 160 | 0.47 | 33  | 1.74  | 645  | 33   |
| NP_001003810.1 | HNRNPD    | 158 | 0.46 | 32  | 1.66  | 615  | 3    |
| NP_000963.1    | RPL7A     | 157 | 0.46 | 55  | 3.29  | 1121 | 1121 |
| NP_001011.1    | RPS16     | 157 | 0.46 | 56  | 3.06  | 1045 | 1045 |
| NP_000959.2    | RPL4      | 156 | 0.45 | 98  | 4.75  | 1613 | 1613 |

|                |           |     |      |      |       |       |       |
|----------------|-----------|-----|------|------|-------|-------|-------|
| NP_001001.2    | RPS6      | 156 | 0.45 | 74   | 2.74  | 931   | 931   |
| NP_066953.1    | PPIA      | 156 | 0.45 | 53   | 2.40  | 819   | 819   |
| NP_001001937.1 | ATP5A1    | 155 | 0.45 | 91   | 4.03  | 1370  | 1370  |
| NP_001627.2    | SLC25A6   | 155 | 0.45 | 58   | 3.10  | 1067  | 1067  |
| NP_002943.2    | RPS2      | 155 | 0.45 | 63   | 3.50  | 1194  | 1194  |
| NP_000981.1    | RPL27A    | 154 | 0.45 | 21   | 1.59  | 538   | 538   |
| NP_000997.1    | RPS3A     | 154 | 0.45 | 58   | 4.08  | 1393  | 1393  |
| NP_001002.1    | RPS7      | 154 | 0.45 | 29   | 2.30  | 790   | 790   |
| NP_001677.2    | ATP5B     | 154 | 0.45 | 112  | 4.01  | 1373  | 1373  |
| NP_005800.3    | PRDX2     | 154 | 0.45 | 60   | 2.04  | 698   | 426   |
| NP_000993.1    | RPLP0     | 153 | 0.45 | 65   | 3.72  | 1272  | 1272  |
| NP_001138898.1 | CSDA      | 153 | 0.45 | 53   | 2.35  | 804   | 804   |
| NP_001348.2    | DHX9      | 153 | 0.45 | 186  | 6.37  | 2173  | 2173  |
| NP_000966.2    | RPL11     | 152 | 0.44 | 25   | 1.66  | 559   | 559   |
| NP_001180345.1 | DDX3X     | 152 | 0.44 | 91   | 4.23  | 1442  | 1253  |
| NP_003642.3    | CSDA      | 152 | 0.44 | 70   | 2.56  | 876   | 876   |
| NP_733759.1    | HIST1H2BA | 152 | 0.44 | 72   | 3.23  | 1106  | 1106  |
| NP_001188412.1 | ENO1      | 152 | 0.44 | 140  | 6.00  | 1951  | 8     |
| NP_000967.1    | RPL12     | 150 | 0.44 | 39   | 2.36  | 803   | 803   |
| NP_001021.1    | RPS27     | 150 | 0.44 | 35   | 1.41  | 482   | 158   |
| NP_001142.2    | SLC25A4   | 149 | 0.43 | 45   | 2.43  | 826   | 826   |
| NP_000970.1    | RPL18     | 148 | 0.43 | 82   | 2.58  | 884   | 884   |
| NP_000977.1    | RPL24     | 148 | 0.43 | 23   | 1.74  | 584   | 584   |
| NP_001013.1    | RPS19     | 148 | 0.43 | 63   | 2.98  | 1019  | 1019  |
| NP_001952.1    | EEF2      | 148 | 0.43 | 240  | 5.72  | 1939  | 1885  |
| NP_002464.1    | MYH9      | 148 | 0.43 | 754  | 13.07 | 4440  | 4429  |
| NP_006752.1    | YWHAE     | 148 | 0.43 | 42   | 2.95  | 986   | 819   |
| NP_000976.1    | RPL17     | 147 | 0.43 | 35   | 2.16  | 737   | 737   |
| NP_004490.2    | HNRNPAB   | 147 | 0.43 | 25   | 1.58  | 538   | 465   |
| NP_003008.1    | SRSF3     | 146 | 0.43 | 14   | 1.69  | 575   | 368   |
| NP_005498.1    | CFL1      | 146 | 0.43 | 34   | 1.50  | 507   | 275   |
| NP_008869.1    | SNRPD1    | 145 | 0.42 | 82   | 3.80  | 1304  | 1304  |
| NP_001070910.1 | HNRNPC    | 144 | 0.42 | 57   | 3.13  | 1070  | 1070  |
| NP_001070911.1 | HNRNPC    | 144 | 0.42 | 65   | 3.29  | 1125  | 1125  |
| NP_001116137.1 | DDX3Y     | 143 | 0.42 | 70   | 2.90  | 984   | 795   |
| NP_006363.4    | SYNCRIP   | 143 | 0.42 | 104  | 2.83  | 964   | 964   |
| NP_005057.1    | SFPQ      | 142 | 0.41 | 368  | 7.76  | 2645  | 2460  |
| NP_001004.2    | RPS9      | 139 | 0.41 | 55   | 2.84  | 961   | 961   |
| NP_001008.1    | RPS13     | 139 | 0.41 | 22   | 1.86  | 636   | 636   |
| NP_001026854.1 | SRSF7     | 139 | 0.41 | 36   | 1.64  | 557   | 350   |
| NP_001524.2    | HNRNPL    | 139 | 0.41 | 266  | 4.24  | 1446  | 1419  |
| NP_004166.1    | SNRPD3    | 139 | 0.41 | 195  | 4.10  | 1403  | 1403  |
| NP_005547.3    | KRT7      | 139 | 0.41 | 197  | 3.48  | 1164  | 454   |
| NP_006100.2    | PRMT5     | 139 | 0.41 | 3569 | 94.88 | 32512 | 32512 |
| NP_000962.2    | RPL7      | 138 | 0.40 | 78   | 3.42  | 1169  | 1169  |
| NP_000974.1    | RPL22     | 138 | 0.40 | 26   | 1.30  | 442   | 442   |
| NP_057004.1    | RPS27L    | 137 | 0.40 | 21   | 1.04  | 358   | 34    |
| NP_001005.1    | RPS10     | 136 | 0.40 | 34   | 2.22  | 757   | 756   |
| NP_001164105.1 | FUS       | 136 | 0.40 | 155  | 6.58  | 2238  | 1835  |
| NP_005817.1    | HNRNPR    | 136 | 0.40 | 185  | 3.14  | 1076  | 1076  |
| NP_110379.2    | TCP1      | 136 | 0.40 | 116  | 4.36  | 1492  | 1492  |
| NP_000961.2    | RPL6      | 135 | 0.39 | 296  | 5.08  | 1738  | 1738  |
| NP_000984.1    | RPL31     | 135 | 0.39 | 28   | 1.41  | 481   | 481   |
| NP_002130.2    | RBMX      | 135 | 0.39 | 79   | 3.56  | 1201  | 1201  |
| NP_005773.3    | ALYREF    | 135 | 0.39 | 41   | 2.42  | 828   | 828   |
| NP_000964.1    | RPL8      | 134 | 0.39 | 50   | 2.46  | 837   | 837   |
| NP_000979.1    | RPL27     | 134 | 0.39 | 62   | 1.55  | 530   | 530   |

|                |         |     |      |      |       |       |       |
|----------------|---------|-----|------|------|-------|-------|-------|
| NP_001129171.1 | YWHAZ   | 134 | 0.39 | 35   | 1.82  | 607   | 406   |
| NP_003320.2    | TXN     | 134 | 0.39 | 15   | 1.03  | 350   | 350   |
| NP_066964.1    | XRCC5   | 134 | 0.39 | 78   | 2.82  | 956   | 956   |
| NP_001191397.1 | RBM10   | 133 | 0.39 | 277  | 9.72  | 3289  | 3255  |
| NP_001988.1    | FAU     | 133 | 0.39 | 14   | 0.94  | 322   | 322   |
| NP_006187.2    | PCBP1   | 133 | 0.39 | 120  | 3.49  | 1182  | 1182  |
| NP_524147.2    | MYL6    | 133 | 0.39 | 55   | 1.74  | 584   | 584   |
| NP_000994.1    | RPLP1   | 132 | 0.38 | 35   | 1.61  | 551   | 551   |
| NP_001395.1    | EEF1G   | 132 | 0.38 | 48   | 2.29  | 783   | 783   |
| NP_003082.1    | SNRPB   | 132 | 0.38 | 240  | 5.86  | 2004  | 2004  |
| NP_919223.1    | HNRNPA3 | 132 | 0.38 | 48   | 1.90  | 645   | 645   |
| NP_001407.1    | EIF4A1  | 131 | 0.38 | 92   | 3.38  | 1145  | 1145  |
| NP_003132.2    | TRIM21  | 131 | 0.38 | 591  | 15.90 | 5435  | 5435  |
| NP_004719.2    | DDX21   | 131 | 0.38 | 93   | 4.29  | 1450  | 1276  |
| NP_005110.2    | THRAP3  | 131 | 0.38 | 191  | 7.13  | 2415  | 2320  |
| NP_006422.1    | CCT2    | 131 | 0.38 | 98   | 4.84  | 1645  | 1645  |
| NP_114366.1    | PCBP2   | 131 | 0.38 | 58   | 2.28  | 774   | 774   |
| NP_001017.1    | RPS24   | 130 | 0.38 | 38   | 1.72  | 581   | 581   |
| NP_003118.2    | SPTAN1  | 130 | 0.38 | 272  | 10.46 | 3526  | 3526  |
| NP_004588.1    | SNRPD2  | 130 | 0.38 | 46   | 2.31  | 790   | 790   |
| NP_004850.1    | CLTC    | 130 | 0.38 | 251  | 5.16  | 1748  | 1748  |
| NP_008835.5    | PRKDC   | 130 | 0.38 | 206  | 6.48  | 2183  | 2183  |
| NP_009140.1    | RPL35   | 130 | 0.38 | 68   | 1.52  | 520   | 520   |
| NP_001182461.1 | SPTAN1  | 129 | 0.38 | 274  | 10.39 | 3505  | 3505  |
| NP_003119.2    | SPTBN1  | 129 | 0.38 | 269  | 10.00 | 3377  | 3377  |
| NP_009202.1    | STK38   | 129 | 0.38 | 515  | 23.80 | 8126  | 7191  |
| NP_036205.1    | CCT5    | 129 | 0.38 | 66   | 4.36  | 1473  | 1473  |
| NP_114368.1    | PTBP1   | 129 | 0.38 | 114  | 3.09  | 1055  | 1055  |
| NP_001014.1    | RPS20   | 128 | 0.37 | 18   | 1.34  | 458   | 458   |
| NP_006421.2    | CCT4    | 128 | 0.37 | 74   | 3.41  | 1146  | 1146  |
| NP_000958.1    | RPL3    | 127 | 0.37 | 171  | 4.21  | 1427  | 1427  |
| NP_001181883.1 | MATR3   | 127 | 0.37 | 109  | 4.21  | 1422  | 1422  |
| NP_006576.2    | CCT8    | 127 | 0.37 | 90   | 4.60  | 1572  | 1572  |
| NP_077007.1    | WDR77   | 127 | 0.37 | 1271 | 31.97 | 10958 | 10958 |
| NP_000978.1    | RPL26   | 126 | 0.37 | 26   | 1.98  | 674   | 674   |
| NP_001000.2    | RPS5    | 126 | 0.37 | 21   | 1.48  | 500   | 500   |
| NP_002559.2    | PABPC1  | 126 | 0.37 | 123  | 3.55  | 1201  | 1201  |
| NP_000025.1    | ALDOA   | 125 | 0.36 | 86   | 2.55  | 873   | 873   |
| NP_001010.2    | RPS15A  | 125 | 0.36 | 46   | 2.44  | 826   | 826   |
| NP_001012.1    | RPS17   | 125 | 0.36 | 45   | 2.09  | 716   | 716   |
| NP_001022.1    | RPS28   | 125 | 0.36 | 15   | 0.80  | 272   | 272   |
| NP_001753.1    | CCT6A   | 125 | 0.36 | 70   | 3.35  | 1144  | 1144  |
| NP_005955.1    | null    | 125 | 0.36 | 242  | 6.00  | 2019  | 2008  |
| NP_001609.2    | PARP1   | 124 | 0.36 | 167  | 5.10  | 1729  | 1729  |
| NP_003290.1    | HSP90B1 | 124 | 0.36 | 101  | 4.51  | 1524  | 1305  |
| NP_005989.3    | CCT3    | 124 | 0.36 | 71   | 3.20  | 1080  | 1080  |
| NP_009057.1    | VCP     | 124 | 0.36 | 121  | 6.10  | 2076  | 2076  |
| NP_842565.2    | SPTBN1  | 124 | 0.36 | 243  | 9.12  | 3079  | 3079  |
| NP_000652.2    | RPL9    | 123 | 0.36 | 69   | 2.19  | 751   | 751   |
| NP_001156008.1 | RBMXL1  | 123 | 0.36 | 65   | 2.36  | 804   | 804   |
| NP_001460.1    | XRCC6   | 123 | 0.36 | 87   | 3.11  | 1060  | 1060  |
| NP_000990.1    | RPL38   | 122 | 0.36 | 70   | 2.66  | 913   | 913   |
| NP_057177.1    | RPL26L1 | 122 | 0.36 | 21   | 1.63  | 558   | 558   |
| NP_001016.1    | RPS23   | 121 | 0.35 | 29   | 1.54  | 528   | 528   |
| NP_001030168.1 | RPL14   | 121 | 0.35 | 37   | 1.78  | 607   | 607   |
| NP_001408.2    | EIF4B   | 121 | 0.35 | 209  | 7.69  | 2606  | 2606  |
| NP_003595.1    | IRS4    | 121 | 0.35 | 129  | 3.36  | 1139  | 1139  |



|                |          |     |      |     |       |      |      |
|----------------|----------|-----|------|-----|-------|------|------|
| NP_006420.1    | CCT7     | 121 | 0.35 | 83  | 3.40  | 1149 | 1149 |
| NP_036558.3    | SF3B3    | 121 | 0.35 | 255 | 5.34  | 1822 | 1822 |
| NP_000983.1    | RPL29    | 120 | 0.35 | 71  | 1.08  | 371  | 371  |
| NP_002939.2    | RPL15    | 120 | 0.35 | 34  | 2.34  | 796  | 796  |
| NP_006397.1    | PRDX4    | 120 | 0.35 | 34  | 0.97  | 327  | 123  |
| NP_001958.2    | EIF4A2   | 119 | 0.35 | 42  | 1.98  | 669  | 669  |
| NP_000960.2    | RPL5     | 118 | 0.34 | 70  | 2.32  | 785  | 785  |
| NP_001006.1    | RPS11    | 118 | 0.34 | 30  | 1.81  | 617  | 617  |
| NP_001018077.1 | SERBP1   | 118 | 0.34 | 31  | 2.14  | 711  | 711  |
| NP_001157790.1 | FLNB     | 118 | 0.34 | 135 | 2.78  | 931  | 931  |
| NP_004506.2    | ILF2     | 118 | 0.34 | 57  | 2.05  | 702  | 702  |
| NP_006704.3    | SUB1     | 118 | 0.34 | 27  | 2.04  | 693  | 693  |
| NP_001284.1    | CLNS1A   | 117 | 0.34 | 353 | 9.85  | 3378 | 3378 |
| NP_006004.2    | RPL10    | 117 | 0.34 | 40  | 2.02  | 687  | 687  |
| NP_001020.2    | RPS26    | 116 | 0.34 | 25  | 0.96  | 322  | 322  |
| NP_001167568.1 | LDHB     | 116 | 0.34 | 105 | 2.92  | 992  | 992  |
| NP_001814.2    | CKB      | 116 | 0.34 | 116 | 3.13  | 1072 | 1053 |
| NP_005753.1    | TRIM28   | 116 | 0.34 | 56  | 2.47  | 836  | 836  |
| NP_001180432.1 | ENO3     | 115 | 0.34 | 30  | 1.36  | 463  | 9    |
| NP_036565.2    | SF3B1    | 115 | 0.34 | 177 | 5.42  | 1840 | 1840 |
| NP_055554.1    | BCLAF1   | 115 | 0.34 | 119 | 5.65  | 1915 | 1820 |
| NP_056444.3    | PRPF31   | 115 | 0.34 | 142 | 3.44  | 1170 | 1170 |
| NP_057103.2    | LUC7L2   | 115 | 0.34 | 110 | 4.88  | 1668 | 1668 |
| NP_001349.2    | DHX15    | 114 | 0.33 | 201 | 4.70  | 1597 | 1540 |
| NP_001427.2    | FBL      | 114 | 0.33 | 29  | 1.38  | 468  | 468  |
| NP_003478.1    | TAF15    | 114 | 0.33 | 38  | 1.85  | 609  | 206  |
| NP_004095.4    | FASN     | 114 | 0.33 | 404 | 8.06  | 2736 | 2736 |
| NP_001032752.1 | EEF1B2   | 113 | 0.33 | 22  | 1.09  | 366  | 360  |
| NP_004514.2    | KIF11    | 113 | 0.33 | 777 | 20.10 | 6853 | 6853 |
| NP_036555.1    | RPL13A   | 112 | 0.33 | 87  | 1.91  | 642  | 642  |
| NP_001966.1    | ENO2     | 111 | 0.32 | 30  | 1.35  | 461  | 12   |
| NP_060090.2    | ILF3     | 111 | 0.32 | 123 | 3.67  | 1231 | 1231 |
| NP_068733.1    | CFL2     | 111 | 0.32 | 17  | 0.83  | 279  | 47   |
| NP_001012321.1 | RPSA     | 110 | 0.32 | 59  | 1.71  | 584  | 584  |
| NP_004332.2    | CAD      | 110 | 0.32 | 116 | 2.65  | 894  | 889  |
| NP_004893.1    | RBM39    | 110 | 0.32 | 68  | 3.10  | 1054 | 1054 |
| NP_112740.1    | HNRPDL   | 110 | 0.32 | 20  | 1.12  | 380  | 212  |
| NP_003555.1    | TAGLN2   | 109 | 0.32 | 15  | 1.13  | 384  | 384  |
| NP_006817.1    | YWHAQ    | 109 | 0.32 | 95  | 1.42  | 468  | 260  |
| NP_001136077.1 | EFTUD2   | 108 | 0.31 | 90  | 3.77  | 1275 | 1221 |
| NP_001138416.1 | MYL12B   | 108 | 0.31 | 85  | 1.32  | 453  | 453  |
| NP_001734.1    | CALM2    | 108 | 0.31 | 233 | 2.17  | 739  | 739  |
| NP_002256.2    | KPNB1    | 108 | 0.31 | 69  | 2.36  | 798  | 798  |
| NP_002257.1    | KPNA2    | 108 | 0.31 | 36  | 1.56  | 523  | 523  |
| NP_003395.1    | YWHAB    | 108 | 0.31 | 27  | 1.49  | 493  | 256  |
| NP_006462.1    | MYL12A   | 108 | 0.31 | 85  | 1.30  | 446  | 446  |
| NP_008855.1    | SRSF1    | 108 | 0.31 | 69  | 2.53  | 863  | 836  |
| NP_001005464.1 | HIST2H3A | 107 | 0.31 | 56  | 2.07  | 685  | 685  |
| NP_003520.1    | HIST1H3A | 107 | 0.31 | 44  | 2.08  | 688  | 688  |
| NP_006316.1    | RAN      | 107 | 0.31 | 39  | 1.12  | 383  | 383  |
| NP_006436.3    | PRPF8    | 107 | 0.31 | 136 | 5.70  | 1917 | 1917 |
| NP_006796.1    | HNRNPAO  | 107 | 0.31 | 31  | 1.07  | 365  | 365  |
| NP_055815.1    | STK38L   | 106 | 0.31 | 375 | 10.31 | 3658 | 2723 |
| NP_000973.2    | RPL21    | 105 | 0.31 | 38  | 1.64  | 557  | 557  |
| NP_001007.2    | RPS12    | 105 | 0.31 | 19  | 1.22  | 417  | 417  |
| NP_001182356.1 | SRSF2    | 105 | 0.31 | 10  | 0.73  | 251  | 251  |
| NP_002893.1    | RCN2     | 105 | 0.31 | 27  | 1.11  | 378  | 378  |

**Supplementary Table 3: Most frequently detected genes in the CRAPome (redundant list - see Methods). Full Table online at [www.crapome.org](http://www.crapome.org). This list was processed using a program developed in house.**

Columns are as follows: GENEID, Universal Gene Symbol; Num Expt Total, number of experiments in which the gene product was identified; Frequency, the percentage of the experiments in the CRAPome in which the gene product was identified; Max SC, the maximum number of spectral counts with which one gene product was identified across all CRAPome experiments; Ave SC, the average number of spectral counts for the gene product across all experiments; Sum SC, the total spectral counts across the entire CRAPome; IsMapped, whether the protein accession number was successfully mapped to a Gene. Note that only mapped entries were used for the calculations Table 1.

| GENEID                          | Num Expt Total | Frequency | Max SC | Ave SC | Sum SC | IsMapped |
|---------------------------------|----------------|-----------|--------|--------|--------|----------|
| HSPA8                           | 328            | 0.96      | 332    | 30.27  | 10381  | Yes      |
| HSPA1B                          | 328            | 0.96      | 331    | 33.44  | 11471  | Yes      |
| HSPA1A                          | 328            | 0.96      | 331    | 33.44  | 11471  | Yes      |
| HSPA1L                          | 322            | 0.94      | 189    | 17.28  | 5926   | Yes      |
| TUBA1C                          | 321            | 0.94      | 281    | 27.99  | 9600   | Yes      |
| TUBA1B                          | 321            | 0.94      | 314    | 29.78  | 10216  | Yes      |
| TUBA1A                          | 321            | 0.94      | 299    | 27.22  | 9337   | Yes      |
| KRT1                            | 320            | 0.93      | 1178   | 75.65  | 25949  | Yes      |
| TUBA3D                          | 318            | 0.93      | 242    | 21.60  | 7410   | Yes      |
| TUBA3C                          | 318            | 0.93      | 242    | 21.60  | 7410   | Yes      |
| HSPA2                           | 318            | 0.93      | 167    | 11.94  | 4096   | Yes      |
| TUBA3E                          | 316            | 0.92      | 227    | 18.79  | 6446   | Yes      |
| TUBB                            | 314            | 0.92      | 338    | 28.72  | 9850   | Yes      |
| HSPA6                           | 313            | 0.91      | 159    | 10.67  | 3659   | Yes      |
| TUBA4A                          | 309            | 0.90      | 242    | 20.47  | 7020   | Yes      |
| TUBB2C                          | 308            | 0.90      | 310    | 22.97  | 7879   | Yes      |
| TUBA8                           | 308            | 0.90      | 175    | 15.21  | 5218   | Yes      |
| TUBB2B                          | 304            | 0.89      | 301    | 20.23  | 6938   | Yes      |
| TUBB2A                          | 304            | 0.89      | 299    | 20.04  | 6873   | Yes      |
| TUBB4                           | 298            | 0.87      | 248    | 16.73  | 5739   | Yes      |
| KRT2                            | 298            | 0.87      | 629    | 38.62  | 13245  | Yes      |
| KRT10                           | 297            | 0.87      | 824    | 58.80  | 20169  | Yes      |
| TUBB3                           | 296            | 0.86      | 172    | 15.18  | 5206   | Yes      |
| ACTG1                           | 295            | 0.86      | 716    | 30.12  | 10332  | Yes      |
| ACTB                            | 295            | 0.86      | 716    | 30.12  | 10332  | Yes      |
| HSPA5                           | 292            | 0.85      | 108    | 10.86  | 3726   | Yes      |
| ACTC1                           | 286            | 0.83      | 357    | 15.91  | 5457   | Yes      |
| ACTA1                           | 286            | 0.83      | 357    | 15.87  | 5445   | Yes      |
| gi 134133226 ref NP_001077007.1 | 284            | 0.83      | 252    | 10.53  | 3612   | No       |
| POTEF                           | 283            | 0.83      | 193    | 8.84   | 3033   | Yes      |
| ACTG2                           | 283            | 0.83      | 293    | 14.37  | 4930   | Yes      |
| ACTA2                           | 283            | 0.83      | 294    | 14.42  | 4946   | Yes      |
| EEF1A1                          | 282            | 0.82      | 160    | 13.06  | 4481   | Yes      |
| KRT9                            | 281            | 0.82      | 699    | 40.96  | 14050  | Yes      |
| EEF1A2                          | 275            | 0.80      | 109    | 8.09   | 2775   | Yes      |
| KRT77                           | 268            | 0.78      | 163    | 5.75   | 1972   | Yes      |
| KRT6B                           | 266            | 0.78      | 320    | 16.77  | 5753   | Yes      |
| ACTBL2                          | 261            | 0.76      | 129    | 6.67   | 2289   | Yes      |
| gi 42558279 ref NP_817124.1     | 254            | 0.74      | 155    | 8.08   | 2772   | No       |
| POTEI                           | 252            | 0.73      | 158    | 5.69   | 1952   | Yes      |
| TUBB6                           | 249            | 0.73      | 94     | 7.48   | 2565   | Yes      |
| POTEJ                           | 240            | 0.70      | 134    | 5.05   | 1733   | Yes      |
| HSPA9                           | 239            | 0.70      | 159    | 9.15   | 3138   | Yes      |
| KRT28                           | 235            | 0.69      | 227    | 7.75   | 2657   | Yes      |
| KRT6C                           | 234            | 0.68      | 212    | 13.76  | 4720   | Yes      |
| KRT6A                           | 234            | 0.68      | 215    | 14.05  | 4820   | Yes      |
| HIST1H1E                        | 234            | 0.68      | 76     | 5.78   | 1983   | Yes      |
| HIST1H1C                        | 234            | 0.68      | 76     | 5.79   | 1986   | Yes      |
| HIST1H1D                        | 233            | 0.68      | 75     | 5.52   | 1893   | Yes      |

|                                 |     |      |     |       |      |     |
|---------------------------------|-----|------|-----|-------|------|-----|
| KRT5                            | 232 | 0.68 | 223 | 15.93 | 5463 | Yes |
| KRT14                           | 230 | 0.67 | 282 | 16.45 | 5644 | Yes |
| TUBB1                           | 224 | 0.65 | 62  | 4.08  | 1399 | Yes |
| KRT75                           | 221 | 0.64 | 80  | 6.39  | 2192 | Yes |
| KRT16                           | 220 | 0.64 | 243 | 14.30 | 4904 | Yes |
| HNRNPK                          | 220 | 0.64 | 143 | 7.62  | 2615 | Yes |
| KRT27                           | 218 | 0.64 | 156 | 5.56  | 1906 | Yes |
| KRT25                           | 218 | 0.64 | 156 | 5.51  | 1891 | Yes |
| RPS27A                          | 213 | 0.62 | 90  | 3.38  | 1160 | Yes |
| HNRNPU                          | 212 | 0.62 | 256 | 8.71  | 2989 | Yes |
| HSP90AB1                        | 211 | 0.62 | 278 | 14.03 | 4813 | Yes |
| HSP90AA1                        | 206 | 0.60 | 219 | 12.90 | 4423 | Yes |
| HIST3H2A                        | 206 | 0.60 | 217 | 6.08  | 2086 | Yes |
| HIST2H2AC                       | 206 | 0.60 | 218 | 6.28  | 2154 | Yes |
| HIST2H2AA4                      | 206 | 0.60 | 218 | 6.28  | 2154 | Yes |
| HIST2H2AA3                      | 206 | 0.60 | 218 | 6.28  | 2154 | Yes |
| HIST1H2AM                       | 206 | 0.60 | 217 | 6.22  | 2134 | Yes |
| HIST1H2AL                       | 206 | 0.60 | 217 | 6.22  | 2134 | Yes |
| HIST1H2AK                       | 206 | 0.60 | 217 | 6.22  | 2134 | Yes |
| HIST1H2AJ                       | 206 | 0.60 | 217 | 6.22  | 2134 | Yes |
| HIST1H2AI                       | 206 | 0.60 | 217 | 6.22  | 2134 | Yes |
| HIST1H2AH                       | 206 | 0.60 | 217 | 6.22  | 2134 | Yes |
| HIST1H2AG                       | 206 | 0.60 | 217 | 6.22  | 2134 | Yes |
| HIST1H2AE                       | 206 | 0.60 | 217 | 6.08  | 2086 | Yes |
| HIST1H2AD                       | 206 | 0.60 | 217 | 6.15  | 2110 | Yes |
| HIST1H2AC                       | 206 | 0.60 | 217 | 6.15  | 2110 | Yes |
| HIST1H2AB                       | 206 | 0.60 | 217 | 6.08  | 2086 | Yes |
| H2AFJ                           | 206 | 0.60 | 217 | 6.22  | 2134 | Yes |
| KRT79                           | 205 | 0.60 | 83  | 5.30  | 1818 | Yes |
| UBA52                           | 202 | 0.59 | 90  | 3.26  | 1119 | Yes |
| VIM                             | 201 | 0.59 | 754 | 20.30 | 6962 | Yes |
| HNRNPA1                         | 201 | 0.59 | 48  | 3.99  | 1368 | Yes |
| gj 310114721 ref XP_003119987.1 | 201 | 0.59 | 50  | 3.16  | 1084 | No  |
| UBC                             | 200 | 0.58 | 90  | 3.22  | 1106 | Yes |
| UBB                             | 200 | 0.58 | 90  | 3.22  | 1106 | Yes |
| RPS3                            | 200 | 0.58 | 56  | 5.96  | 2044 | Yes |
| RPS14                           | 198 | 0.58 | 33  | 2.38  | 815  | Yes |
| KRT17                           | 198 | 0.58 | 121 | 8.45  | 2898 | Yes |
| HNRNPA2B1                       | 197 | 0.57 | 56  | 5.57  | 1912 | Yes |
| NCL                             | 195 | 0.57 | 99  | 6.64  | 2276 | Yes |
| HNRNPH1                         | 195 | 0.57 | 201 | 8.22  | 2821 | Yes |
| KRT19                           | 190 | 0.55 | 151 | 6.21  | 2130 | Yes |
| GAPDH                           | 190 | 0.55 | 97  | 5.18  | 1777 | Yes |
| HNRNPH2                         | 189 | 0.55 | 83  | 4.09  | 1404 | Yes |
| KRT15                           | 188 | 0.55 | 102 | 5.69  | 1951 | Yes |
| KRT13                           | 188 | 0.55 | 126 | 6.28  | 2154 | Yes |
| RPS18                           | 187 | 0.55 | 40  | 2.91  | 997  | Yes |
| PRDX1                           | 186 | 0.54 | 44  | 3.09  | 1060 | Yes |
| HNRNPA1L2                       | 186 | 0.54 | 29  | 2.78  | 953  | Yes |
| gj 55770868 ref NP_064424.3     | 186 | 0.54 | 47  | 2.49  | 855  | No  |
| YBX1                            | 184 | 0.54 | 101 | 3.58  | 1229 | Yes |
| NPM1                            | 184 | 0.54 | 100 | 3.56  | 1220 | Yes |
| KRT18                           | 182 | 0.53 | 311 | 6.66  | 2283 | Yes |
| H2AFZ                           | 182 | 0.53 | 156 | 3.61  | 1237 | Yes |
| H2AFV                           | 182 | 0.53 | 156 | 3.61  | 1237 | Yes |
| DDX5                            | 182 | 0.53 | 86  | 4.14  | 1420 | Yes |
| PKM2                            | 181 | 0.53 | 181 | 7.86  | 2696 | Yes |
| KRT76                           | 181 | 0.53 | 87  | 5.28  | 1811 | Yes |

|                                  |     |      |     |       |      |     |
|----------------------------------|-----|------|-----|-------|------|-----|
| RPL23                            | 178 | 0.52 | 48  | 2.48  | 851  | Yes |
| KRT8                             | 178 | 0.52 | 528 | 8.76  | 3004 | Yes |
| RPL23A                           | 176 | 0.51 | 30  | 2.40  | 824  | Yes |
| HNRNPF                           | 176 | 0.51 | 58  | 3.85  | 1321 | Yes |
| gij 310128732 ref XP_003120650.1 | 176 | 0.51 | 116 | 5.13  | 1758 | No  |
| gij 310128730 ref XP_003120648.1 | 176 | 0.51 | 116 | 5.13  | 1758 | No  |
| DDX17                            | 174 | 0.51 | 80  | 4.17  | 1431 | Yes |
| HIST1H1A                         | 173 | 0.50 | 32  | 2.18  | 748  | Yes |
| HIST1H1T                         | 172 | 0.50 | 32  | 2.03  | 696  | Yes |
| TUBAL3                           | 171 | 0.50 | 22  | 1.63  | 559  | Yes |
| H2AFX                            | 171 | 0.50 | 142 | 3.65  | 1251 | Yes |
| HIST1H2AA                        | 170 | 0.50 | 139 | 3.49  | 1197 | Yes |
| gij 310128736 ref XP_001719942.2 | 169 | 0.49 | 110 | 4.60  | 1578 | No  |
| gij 310128734 ref XP_003120649.1 | 169 | 0.49 | 110 | 4.60  | 1578 | No  |
| KRT24                            | 167 | 0.49 | 97  | 3.45  | 1185 | Yes |
| RPS4X                            | 166 | 0.48 | 58  | 4.44  | 1523 | Yes |
| RPLP2                            | 166 | 0.48 | 117 | 3.13  | 1073 | Yes |
| RPL13                            | 166 | 0.48 | 49  | 2.55  | 873  | Yes |
| C1QBP                            | 165 | 0.48 | 381 | 4.63  | 1588 | Yes |
| HIST4H4                          | 164 | 0.48 | 316 | 7.28  | 2496 | Yes |
| HIST2H4B                         | 164 | 0.48 | 316 | 7.28  | 2496 | Yes |
| HIST2H4A                         | 164 | 0.48 | 316 | 7.28  | 2496 | Yes |
| HIST2H2AB                        | 164 | 0.48 | 50  | 2.24  | 769  | Yes |
| HIST1H4L                         | 164 | 0.48 | 316 | 7.28  | 2496 | Yes |
| HIST1H4K                         | 164 | 0.48 | 316 | 7.28  | 2496 | Yes |
| HIST1H4J                         | 164 | 0.48 | 316 | 7.28  | 2496 | Yes |
| HIST1H4I                         | 164 | 0.48 | 316 | 7.28  | 2496 | Yes |
| HIST1H4H                         | 164 | 0.48 | 316 | 7.28  | 2496 | Yes |
| HIST1H4F                         | 164 | 0.48 | 316 | 7.28  | 2496 | Yes |
| HIST1H4E                         | 164 | 0.48 | 316 | 7.28  | 2496 | Yes |
| HIST1H4D                         | 164 | 0.48 | 316 | 7.28  | 2496 | Yes |
| HIST1H4C                         | 164 | 0.48 | 316 | 7.28  | 2496 | Yes |
| HIST1H4B                         | 164 | 0.48 | 316 | 7.28  | 2496 | Yes |
| HIST1H4A                         | 164 | 0.48 | 316 | 7.28  | 2496 | Yes |
| RPS8                             | 163 | 0.48 | 51  | 3.19  | 1094 | Yes |
| HSPD1                            | 163 | 0.48 | 165 | 5.67  | 1946 | Yes |
| SLC25A5                          | 162 | 0.47 | 58  | 2.95  | 1012 | Yes |
| HNRNPM                           | 161 | 0.47 | 149 | 7.33  | 2514 | Yes |
| HIST3H2BB                        | 160 | 0.47 | 145 | 7.01  | 2406 | Yes |
| HIST2H2BF                        | 160 | 0.47 | 154 | 7.53  | 2583 | Yes |
| HIST2H2BE                        | 160 | 0.47 | 150 | 7.20  | 2468 | Yes |
| HIST1H2BO                        | 160 | 0.47 | 150 | 7.20  | 2468 | Yes |
| HIST1H2BN                        | 160 | 0.47 | 154 | 7.53  | 2583 | Yes |
| HIST1H2BM                        | 160 | 0.47 | 154 | 7.53  | 2583 | Yes |
| HIST1H2BL                        | 160 | 0.47 | 153 | 7.49  | 2569 | Yes |
| HIST1H2BK                        | 160 | 0.47 | 154 | 7.52  | 2579 | Yes |
| HIST1H2BJ                        | 160 | 0.47 | 150 | 7.18  | 2464 | Yes |
| HIST1H2BI                        | 160 | 0.47 | 154 | 7.53  | 2583 | Yes |
| HIST1H2BH                        | 160 | 0.47 | 154 | 7.53  | 2583 | Yes |
| HIST1H2BG                        | 160 | 0.47 | 154 | 7.53  | 2583 | Yes |
| HIST1H2BF                        | 160 | 0.47 | 154 | 7.53  | 2583 | Yes |
| HIST1H2BE                        | 160 | 0.47 | 154 | 7.53  | 2583 | Yes |
| HIST1H2BD                        | 160 | 0.47 | 154 | 7.53  | 2583 | Yes |
| HIST1H2BC                        | 160 | 0.47 | 154 | 7.53  | 2583 | Yes |
| HIST1H2BB                        | 160 | 0.47 | 150 | 7.20  | 2468 | Yes |
| FLNA                             | 158 | 0.46 | 305 | 11.62 | 3986 | Yes |
| KRT4                             | 156 | 0.45 | 43  | 2.23  | 764  | Yes |
| ENO1                             | 155 | 0.45 | 163 | 7.04  | 2414 | Yes |

|                                  |     |      |      |       |       |     |
|----------------------------------|-----|------|------|-------|-------|-----|
| DCD                              | 155 | 0.45 | 45   | 2.00  | 687   | Yes |
| RPS25                            | 154 | 0.45 | 18   | 1.69  | 579   | Yes |
| HNRNPD                           | 153 | 0.45 | 28   | 1.50  | 513   | Yes |
| RPL19                            | 152 | 0.44 | 67   | 1.75  | 599   | Yes |
| NONO                             | 152 | 0.44 | 386  | 7.87  | 2701  | Yes |
| KRT26                            | 150 | 0.44 | 92   | 3.19  | 1095  | Yes |
| RPLP0                            | 149 | 0.43 | 47   | 3.27  | 1122  | Yes |
| RPL4                             | 148 | 0.43 | 81   | 3.97  | 1361  | Yes |
| RPL11                            | 148 | 0.43 | 20   | 1.36  | 465   | Yes |
| RPS16                            | 147 | 0.43 | 42   | 2.47  | 848   | Yes |
| RPL7A                            | 147 | 0.43 | 48   | 2.78  | 953   | Yes |
| ATP5A1                           | 147 | 0.43 | 83   | 3.43  | 1175  | Yes |
| ATP5B                            | 145 | 0.42 | 106  | 3.56  | 1220  | Yes |
| SNRPD1                           | 144 | 0.42 | 63   | 3.26  | 1117  | Yes |
| KRT35                            | 144 | 0.42 | 62   | 2.24  | 770   | Yes |
| KRT3                             | 144 | 0.42 | 62   | 3.90  | 1337  | Yes |
| HNRNPAB                          | 144 | 0.42 | 20   | 1.32  | 454   | Yes |
| DDX3X                            | 144 | 0.42 | 87   | 3.63  | 1246  | Yes |
| RPS6                             | 143 | 0.42 | 63   | 2.35  | 807   | Yes |
| RPS2                             | 143 | 0.42 | 52   | 2.80  | 961   | Yes |
| KRT31                            | 143 | 0.42 | 83   | 2.55  | 876   | Yes |
| DHX9                             | 143 | 0.42 | 169  | 5.45  | 1870  | Yes |
| CSDA                             | 143 | 0.42 | 64   | 2.22  | 760   | Yes |
| SLC25A6                          | 142 | 0.41 | 47   | 2.43  | 835   | Yes |
| RPS19                            | 142 | 0.41 | 58   | 2.56  | 879   | Yes |
| RPL27A                           | 142 | 0.41 | 19   | 1.37  | 471   | Yes |
| KRT33B                           | 142 | 0.41 | 63   | 2.36  | 810   | Yes |
| ALB                              | 142 | 0.41 | 93   | 4.50  | 1545  | Yes |
| RPS3A                            | 141 | 0.41 | 47   | 3.35  | 1149  | Yes |
| KRT32                            | 141 | 0.41 | 62   | 2.08  | 714   | Yes |
| RPL12                            | 140 | 0.41 | 30   | 2.10  | 720   | Yes |
| PRDX2                            | 140 | 0.41 | 54   | 1.70  | 584   | Yes |
| YBX2                             | 139 | 0.41 | 29   | 1.50  | 513   | Yes |
| RPL18                            | 139 | 0.41 | 64   | 2.26  | 776   | Yes |
| MYH9                             | 139 | 0.41 | 670  | 11.09 | 3804  | Yes |
| gij 310128738 ref XP_003120651.1 | 139 | 0.41 | 94   | 3.56  | 1221  | No  |
| EEF2                             | 139 | 0.41 | 219  | 4.78  | 1638  | Yes |
| RPS7                             | 138 | 0.40 | 27   | 1.90  | 653   | Yes |
| KRT38                            | 138 | 0.40 | 62   | 1.98  | 679   | Yes |
| KRT37                            | 138 | 0.40 | 62   | 1.98  | 678   | Yes |
| KRT36                            | 138 | 0.40 | 62   | 2.03  | 697   | Yes |
| SLC25A4                          | 136 | 0.40 | 40   | 1.89  | 648   | Yes |
| PRMT5                            | 136 | 0.40 | 2950 | 78.36 | 26876 | Yes |
| DDX3Y                            | 136 | 0.40 | 66   | 2.45  | 841   | Yes |
| SRSF3                            | 135 | 0.39 | 14   | 1.38  | 475   | Yes |
| RPL24                            | 135 | 0.39 | 22   | 1.45  | 497   | Yes |
| SYNCRIP                          | 133 | 0.39 | 97   | 2.45  | 842   | Yes |
| SFPQ                             | 133 | 0.39 | 336  | 6.68  | 2291  | Yes |
| RPL7                             | 133 | 0.39 | 66   | 2.87  | 985   | Yes |
| RPL22                            | 133 | 0.39 | 26   | 1.20  | 413   | Yes |
| RPL17                            | 133 | 0.39 | 29   | 1.79  | 615   | Yes |
| HNRNPL                           | 133 | 0.39 | 236  | 3.69  | 1267  | Yes |
| gij 228008398 ref NP_001153146.1 | 133 | 0.39 | 95   | 2.42  | 830   | No  |
| CFL1                             | 133 | 0.39 | 30   | 1.32  | 452   | Yes |
| RPS10                            | 132 | 0.38 | 25   | 1.80  | 616   | Yes |
| gij 228008295 ref NP_001153147.1 | 132 | 0.38 | 97   | 2.41  | 826   | No  |
| RPS27                            | 131 | 0.38 | 28   | 1.10  | 379   | Yes |
| PPIA                             | 131 | 0.38 | 44   | 1.92  | 658   | Yes |

|           |     |      |      |       |      |     |
|-----------|-----|------|------|-------|------|-----|
| FUS       | 131 | 0.38 | 129  | 5.59  | 1916 | Yes |
| SRSF7     | 130 | 0.38 | 34   | 1.40  | 479  | Yes |
| RPLP1     | 130 | 0.38 | 35   | 1.55  | 530  | Yes |
| RBM10     | 130 | 0.38 | 240  | 8.21  | 2817 | Yes |
| YWHAE     | 129 | 0.38 | 37   | 2.33  | 798  | Yes |
| HNRNPR    | 129 | 0.38 | 173  | 2.78  | 952  | Yes |
| STK38     | 128 | 0.37 | 381  | 18.09 | 6204 | Yes |
| PCBP1     | 128 | 0.37 | 108  | 3.04  | 1043 | Yes |
| HNRNPC    | 127 | 0.37 | 57   | 2.82  | 967  | Yes |
| EEF1G     | 127 | 0.37 | 41   | 1.85  | 634  | Yes |
| THOC4     | 126 | 0.37 | 38   | 2.09  | 717  | Yes |
| TCP1      | 126 | 0.37 | 106  | 3.64  | 1247 | Yes |
| SNRPD3    | 126 | 0.37 | 152  | 3.08  | 1055 | Yes |
| PCBP2     | 126 | 0.37 | 53   | 1.96  | 673  | Yes |
| MYL6      | 126 | 0.37 | 42   | 1.43  | 489  | Yes |
| WDR77     | 125 | 0.36 | 1143 | 27.62 | 9472 | Yes |
| SNRPN     | 125 | 0.36 | 196  | 4.80  | 1646 | Yes |
| SNRPB     | 125 | 0.36 | 196  | 4.80  | 1647 | Yes |
| RPL31     | 125 | 0.36 | 21   | 1.08  | 369  | Yes |
| XRCC5     | 124 | 0.36 | 71   | 2.28  | 782  | Yes |
| THRAP3    | 124 | 0.36 | 176  | 6.05  | 2074 | Yes |
| RPL6      | 124 | 0.36 | 249  | 4.15  | 1423 | Yes |
| RBMX      | 124 | 0.36 | 68   | 3.05  | 1045 | Yes |
| HNRNPA3   | 124 | 0.36 | 43   | 1.61  | 551  | Yes |
| EIF4A1    | 124 | 0.36 | 87   | 2.82  | 966  | Yes |
| CLTC      | 124 | 0.36 | 234  | 4.36  | 1497 | Yes |
| CCT4      | 124 | 0.36 | 62   | 2.84  | 975  | Yes |
| SPTAN1    | 123 | 0.36 | 239  | 8.89  | 3048 | Yes |
| HIST1H2BA | 123 | 0.36 | 45   | 2.13  | 732  | Yes |
| DDX21     | 123 | 0.36 | 75   | 3.51  | 1205 | Yes |
| TXN       | 122 | 0.36 | 10   | 0.84  | 287  | Yes |
| TRIM21    | 122 | 0.36 | 473  | 12.99 | 4456 | Yes |
| RPS24     | 122 | 0.36 | 36   | 1.47  | 504  | Yes |
| CCT8      | 122 | 0.36 | 82   | 3.95  | 1356 | Yes |
| RPL8      | 121 | 0.35 | 42   | 2.09  | 716  | Yes |
| RPL27     | 121 | 0.35 | 42   | 1.24  | 425  | Yes |
| PRPH      | 121 | 0.35 | 98   | 1.87  | 642  | Yes |
| HSP90B1   | 121 | 0.35 | 96   | 3.84  | 1318 | Yes |
| CCT5      | 121 | 0.35 | 62   | 3.76  | 1289 | Yes |
| RPS13     | 120 | 0.35 | 17   | 1.50  | 513  | Yes |
| RPS28     | 119 | 0.35 | 14   | 0.70  | 240  | Yes |
| RPS17L    | 119 | 0.35 | 42   | 1.87  | 642  | Yes |
| RPS17     | 119 | 0.35 | 42   | 1.87  | 642  | Yes |
| RPS15A    | 119 | 0.35 | 36   | 2.01  | 689  | Yes |
| PARP1     | 119 | 0.35 | 151  | 4.31  | 1480 | Yes |
| CCT2      | 119 | 0.35 | 95   | 4.19  | 1436 | Yes |
| SNRPD2    | 118 | 0.34 | 40   | 1.98  | 679  | Yes |
| SLC25A31  | 118 | 0.34 | 13   | 0.88  | 303  | Yes |
| RPL35     | 118 | 0.34 | 56   | 1.20  | 411  | Yes |
| RPL29     | 117 | 0.34 | 65   | 0.96  | 328  | Yes |
| PABPC1    | 117 | 0.34 | 104  | 2.95  | 1013 | Yes |
| CCT6A     | 117 | 0.34 | 65   | 2.84  | 973  | Yes |
| ALDOA     | 117 | 0.34 | 72   | 2.13  | 730  | Yes |
| YWHAZ     | 116 | 0.34 | 26   | 1.44  | 493  | Yes |
| SPTBN1    | 116 | 0.34 | 232  | 8.52  | 2922 | Yes |
| RPS27L    | 116 | 0.34 | 18   | 0.80  | 275  | Yes |
| RPS20     | 116 | 0.34 | 15   | 1.17  | 400  | Yes |
| MATR3     | 116 | 0.34 | 96   | 3.59  | 1230 | Yes |

Supplementary Table 4: List of the most enriched GO Biological Process level 3 categories from the top most frequently detected proteins in the CRAPome

| Term                                                                                 | Count | %           | PValue   | List Total | Pop Hits | Pop Total | Fold Enrichment | Bonferroni  | Benjamini   | FDR         |
|--------------------------------------------------------------------------------------|-------|-------------|----------|------------|----------|-----------|-----------------|-------------|-------------|-------------|
| GO:0010467~gene expression                                                           | 446   | 32.91512915 | 4.81E-37 | 1179       | 2999     | 13463     | 1.698190604     | 3.46E-34    | 3.46E-34    | 7.28E-34    |
| GO:0044260~cellular macromolecule metabolic process                                  | 651   | 48.04428044 | 2.17E-33 | 1179       | 5214     | 13463     | 1.425732345     | 1.56E-30    | 7.81E-31    | 3.29E-30    |
| GO:0006139~nucleobase, nucleoside, nucleotide and nucleic acid metabolic process     | 448   | 33.06273063 | 3.80E-24 | 1179       | 3409     | 13463     | 1.500648759     | 2.73E-21    | 9.10E-22    | 5.75E-21    |
| GO:0034641~cellular nitrogen compound metabolic process                              | 467   | 34.46494465 | 2.67E-22 | 1179       | 3670     | 13463     | 1.453044306     | 1.92E-19    | 4.80E-20    | 4.04E-19    |
| GO:0042254~ribosome biogenesis                                                       | 50    | 3.6900369   | 3.32E-21 | 1179       | 122      | 13463     | 4.679917685     | 2.39E-18    | 4.78E-19    | 5.03E-18    |
| GO:0065003~macromolecular complex assembly                                           | 135   | 9.963099631 | 3.94E-21 | 1179       | 665      | 13463     | 2.318142685     | 2.83E-18    | 4.72E-19    | 5.96E-18    |
| GO:0034621~cellular macromolecular complex subunit organization                      | 89    | 6.568265683 | 6.46E-20 | 1179       | 357      | 13463     | 2.84675329      | 4.65E-17    | 6.64E-18    | 9.78E-17    |
| GO:0034622~cellular macromolecular complex assembly                                  | 82    | 6.051660517 | 2.39E-19 | 1179       | 318      | 13463     | 2.944521794     | 1.72E-16    | 2.15E-17    | 3.61E-16    |
| GO:0006403~RNA localization                                                          | 38    | 2.804428044 | 6.32E-15 | 1179       | 100      | 13463     | 4.339219678     | 4.55E-12    | 5.06E-13    | 9.58E-12    |
| GO:0022402~cell cycle process                                                        | 108   | 7.970479705 | 6.62E-15 | 1179       | 565      | 13463     | 2.182746741     | 4.79E-12    | 4.79E-13    | 1.01E-11    |
| GO:0051276~chromosome organization                                                   | 96    | 7.084870849 | 2.84E-14 | 1179       | 485      | 13463     | 2.260255502     | 2.04E-11    | 1.85E-12    | 4.28E-11    |
| GO:0050658~RNA transport                                                             | 36    | 2.656826568 | 8.19E-14 | 1179       | 97       | 13463     | 4.237979067     | 5.89E-11    | 4.91E-12    | 1.24E-10    |
| GO:0051236~establishment of RNA localization                                         | 36    | 2.656826568 | 8.19E-14 | 1179       | 97       | 13463     | 4.237979067     | 5.89E-11    | 4.91E-12    | 1.24E-10    |
| GO:0019538~protein metabolic process                                                 | 349   | 25.75645756 | 1.19E-13 | 1179       | 2812     | 13463     | 1.417222868     | 8.57E-11    | 6.59E-12    | 1.80E-10    |
| GO:0000278~mitotic cell cycle                                                        | 79    | 5.830258303 | 1.21E-13 | 1179       | 370      | 13463     | 2.43811063      | 8.71E-11    | 6.22E-12    | 1.83E-10    |
| GO:0015931~nucleobase, nucleoside, nucleotide and nucleic acid transport             | 38    | 2.804428044 | 5.14E-13 | 1179       | 113      | 13463     | 3.840017414     | 3.69E-10    | 2.46E-11    | 7.78E-10    |
| GO:0022618~ribonucleoprotein complex assembly                                        | 28    | 2.066420664 | 6.21E-12 | 1179       | 69       | 13463     | 4.633796757     | 4.46E-09    | 2.79E-10    | 9.39E-09    |
| GO:0051439~regulation of ubiquitin-protein ligase activity during mitotic cell cycle | 28    | 2.066420664 | 1.37E-11 | 1179       | 71       | 13463     | 4.503267271     | 9.87E-09    | 5.81E-10    | 2.08E-08    |
| GO:0046907~intracellular transport                                                   | 109   | 8.044280443 | 5.93E-11 | 1179       | 657      | 13463     | 1.894476267     | 4.26E-08    | 2.37E-09    | 8.97E-08    |
| GO:0006461~protein complex assembly                                                  | 88    | 6.494464945 | 4.47E-10 | 1179       | 505      | 13463     | 1.989845397     | 3.22E-07    | 1.69E-08    | 6.77E-07    |
| GO:0042273~ribosomal large subunit biogenesis                                        | 10    | 0.73800738  | 2.69E-09 | 1179       | 10       | 13463     | 11.41899915     | 1.94E-06    | 9.69E-08    | 4.08E-06    |
| GO:0042274~ribosomal small subunit biogenesis                                        | 10    | 0.73800738  | 1.37E-08 | 1179       | 11       | 13463     | 10.38090832     | 9.82E-06    | 4.68E-07    | 2.07E-05    |
| GO:0007010~cytoskeleton organization                                                 | 74    | 5.461254613 | 4.00E-08 | 1179       | 436      | 13463     | 1.938087012     | 2.88E-05    | 1.31E-06    | 6.05E-05    |
| GO:0009059~macromolecule biosynthetic process                                        | 320   | 23.61623616 | 1.28E-07 | 1179       | 2832     | 13463     | 1.29028239      | 9.20E-05    | 4.00E-06    | 1.94E-04    |
| GO:0034728~nucleosome organization                                                   | 26    | 1.918819188 | 2.46E-07 | 1179       | 93       | 13463     | 3.192408365     | 1.77E-04    | 7.37E-06    | 3.73E-04    |
| GO:0051649~establishment of localization in cell                                     | 118   | 8.708487085 | 4.19E-07 | 1179       | 852      | 13463     | 1.581504577     | 3.01E-04    | 1.20E-05    | 6.34E-04    |
| GO:0044249~cellular biosynthetic process                                             | 373   | 27.52767528 | 7.26E-07 | 1179       | 3442     | 13463     | 1.237445289     | 5.22E-04    | 2.01E-05    | 0.001098184 |
| GO:0010605~negative regulation of macromolecule metabolic process                    | 104   | 7.675276753 | 7.67E-07 | 1179       | 734      | 13463     | 1.617950834     | 5.51E-04    | 2.04E-05    | 0.00116091  |
| GO:0031497~chromatin assembly                                                        | 24    | 1.771217712 | 1.02E-06 | 1179       | 87       | 13463     | 3.150068732     | 7.32E-04    | 2.62E-05    | 0.001542051 |
| GO:0070727~cellular macromolecule localization                                       | 67    | 4.944649446 | 1.11E-06 | 1179       | 414      | 13463     | 1.848002278     | 8.00E-04    | 2.76E-05    | 0.001685409 |
| GO:0022403~cell cycle phase                                                          | 66    | 4.870848708 | 2.30E-06 | 1179       | 414      | 13463     | 1.820420155     | 0.001650138 | 5.50E-05    | 0.003476287 |
| GO:0009892~negative regulation of metabolic process                                  | 107   | 7.896678967 | 2.51E-06 | 1179       | 780      | 13463     | 1.566452448     | 0.001803654 | 5.82E-05    | 0.003799979 |
| GO:0051128~regulation of cellular component organization                             | 71    | 5.239852399 | 2.52E-06 | 1179       | 458      | 13463     | 1.770194192     | 0.001812485 | 5.67E-05    | 0.003818599 |
| GO:0046164~alcohol catabolic process                                                 | 22    | 1.623616236 | 4.18E-06 | 1179       | 81       | 13463     | 3.10145656      | 0.003004298 | 9.12E-05    | 0.00633325  |
| GO:0006986~response to unfolded protein                                              | 20    | 1.47601476  | 7.21E-06 | 1179       | 71       | 13463     | 3.216619479     | 0.005172002 | 1.53E-04    | 0.010914519 |
| GO:0006974~response to DNA damage stimulus                                           | 59    | 4.354243542 | 1.08E-05 | 1179       | 373      | 13463     | 1.806222386     | 0.007737026 | 2.22E-04    | 0.016348136 |
| GO:0000387~spliceosomal snRNP biogenesis                                             | 12    | 0.885608856 | 1.17E-05 | 1179       | 28       | 13463     | 4.893856779     | 0.008345291 | 2.33E-04    | 0.01763867  |
| GO:0051789~response to protein stimulus                                              | 25    | 1.84501845  | 1.34E-05 | 1179       | 107      | 13463     | 2.667990456     | 0.009589573 | 2.60E-04    | 0.020281034 |
| GO:0031324~negative regulation of cellular metabolic process                         | 97    | 7.158671587 | 1.65E-05 | 1179       | 720      | 13463     | 1.538392941     | 0.011761673 | 3.11E-04    | 0.024901517 |
| GO:0016052~carbohydrate catabolic process                                            | 25    | 1.84501845  | 1.86E-05 | 1179       | 109      | 13463     | 2.619036503     | 0.013311429 | 3.44E-04    | 0.028204233 |
| GO:0008104~protein localization                                                      | 113   | 8.339483395 | 2.91E-05 | 1179       | 882      | 13463     | 1.462978349     | 0.020700953 | 5.23E-04    | 0.044022357 |
| GO:0033554~cellular response to stress                                               | 78    | 5.756457565 | 5.84E-05 | 1179       | 566      | 13463     | 1.573642993     | 0.04110355  | 0.001023188 | 0.088310821 |
| GO:0033043~regulation of organelle organization                                      | 38    | 2.804428044 | 6.03E-05 | 1179       | 217      | 13463     | 1.999640404     | 0.042427365 | 0.001031698 | 0.091216246 |
| GO:0010639~negative regulation of organelle organization                             | 20    | 1.47601476  | 6.48E-05 | 1179       | 82       | 13463     | 2.785121744     | 0.045551737 | 0.001083641 | 0.09808904  |
| GO:0000226~microtubule cytoskeleton organization                                     | 29    | 2.140221402 | 6.54E-05 | 1179       | 147      | 13463     | 2.252727724     | 0.045917146 | 0.00106772  | 0.098894281 |
| GO:0010033~response to organic substance                                             | 94    | 6.937269373 | 7.98E-05 | 1179       | 721      | 13463     | 1.488746075     | 0.05577324  | 0.001274497 | 0.120728552 |
| GO:0043244~regulation of protein complex disassembly                                 | 15    | 1.10701107  | 8.41E-05 | 1179       | 51       | 13463     | 3.358529162     | 0.05868355  | 0.00131383  | 0.127218459 |
| GO:0007018~microtubule-based movement                                                | 24    | 1.771217712 | 1.01E-04 | 1179       | 113      | 13463     | 2.425274156     | 0.070088306 | 0.001544883 | 0.152841474 |



Supplementary Table 5: List of the most enriched GO Molecular Function level 3 categories from the top most frequently detected proteins in the CRAPome

| Term                                                                              | Count | %           | PValue      | List Total | Pop Hits | Pop Total | Fold Enrichment | Bonferroni  | Benjamini   | FDR         |
|-----------------------------------------------------------------------------------|-------|-------------|-------------|------------|----------|-----------|-----------------|-------------|-------------|-------------|
| GO:0003723~RNA binding                                                            | 262   | 19.33579336 | 1.53E-106   | 1090       | 718      | 13051     | 4.369121668     | 3.09E-104   | 3.09E-104   | 1.92E-103   |
| GO:0016817~hydrolase activity, acting on acid anhydrides                          | 146   | 10.77490775 | 2.74E-22    | 1090       | 764      | 13051     | 2.288109419     | 5.53E-20    | 2.77E-20    | 3.44E-19    |
| GO:0032553~ribonucleotide binding                                                 | 266   | 19.63099631 | 1.08E-21    | 1090       | 1836     | 13051     | 1.734707481     | 2.18E-19    | 7.25E-20    | 1.35E-18    |
| GO:0017076~purine nucleotide binding                                              | 274   | 20.22140221 | 1.67E-21    | 1090       | 1918     | 13051     | 1.710484928     | 3.38E-19    | 8.45E-20    | 2.10E-18    |
| GO:0001883~purine nucleoside binding                                              | 238   | 17.56457565 | 1.09E-20    | 1090       | 1601     | 13051     | 1.779929975     | 2.21E-18    | 4.41E-19    | 1.37E-17    |
| GO:0008092~cytoskeletal protein binding                                           | 101   | 7.453874539 | 6.21E-17    | 1090       | 504      | 13051     | 2.399430246     | 2.24E-14    | 3.77E-15    | 1.44E-13    |
| GO:0008135~translation factor activity, nucleic acid binding                      | 36    | 2.656826568 | 2.81E-14    | 1090       | 98       | 13051     | 4.398389815     | 5.67E-12    | 8.11E-13    | 3.53E-11    |
| GO:0051082~unfolded protein binding                                               | 35    | 2.58302583  | 2.94E-11    | 1090       | 115      | 13051     | 3.644076586     | 5.94E-09    | 7.42E-10    | 3.69E-08    |
| GO:0003743~translation initiation factor activity                                 | 24    | 1.771217712 | 2.13E-10    | 1090       | 61       | 13051     | 4.710843736     | 4.30E-08    | 4.77E-09    | 2.67E-07    |
| GO:0019899~enzyme binding                                                         | 84    | 6.199261993 | 6.32E-09    | 1090       | 523      | 13051     | 1.923069097     | 1.28E-06    | 1.28E-07    | 7.93E-06    |
| GO:0016875~ligase activity, forming carbon-oxygen bonds                           | 19    | 1.402214022 | 1.48E-08    | 1090       | 47       | 13051     | 4.840308413     | 2.99E-06    | 2.72E-07    | 1.86E-05    |
| GO:0008022~protein C-terminus binding                                             | 34    | 2.509225092 | 3.85E-08    | 1090       | 141      | 13051     | 2.88720151      | 7.77E-06    | 6.47E-07    | 4.83E-05    |
| GO:0016885~ligase activity, forming carbon-carbon bonds                           | 6     | 0.442804428 | 7.30E-05    | 1090       | 7        | 13051     | 10.26290957     | 0.014634866 | 0.001133435 | 0.091586475 |
| GO:0042802~identical protein binding                                              | 82    | 6.051660517 | 8.92E-05    | 1090       | 640      | 13051     | 1.53409117      | 0.017865503 | 0.001286815 | 0.111975936 |
| GO:0051920~peroxiredoxin activity                                                 | 6     | 0.442804428 | 1.81E-04    | 1090       | 8        | 13051     | 8.980045872     | 0.035943862 | 0.002437408 | 0.227247685 |
| GO:0005516~calmodulin binding                                                     | 26    | 1.918819188 | 2.15E-04    | 1090       | 140      | 13051     | 2.223630406     | 0.042572615 | 0.002715394 | 0.270022665 |
| GO:0008565~protein transporter activity                                           | 18    | 1.328413284 | 7.44E-04    | 1090       | 87       | 13051     | 2.477254034     | 0.139586491 | 0.008804668 | 0.930031186 |
| GO:0051287~NAD or NADH binding                                                    | 12    | 0.885608856 | 0.001370911 | 1090       | 47       | 13051     | 3.057036892     | 0.242031979 | 0.015277326 | 1.707529298 |
| GO:0008134~transcription factor binding                                           | 63    | 4.649446494 | 0.001856408 | 1090       | 513      | 13051     | 1.470416868     | 0.312946347 | 0.01956104  | 2.305773093 |
| GO:0002060~purine binding                                                         | 4     | 0.295202952 | 0.002173309 | 1090       | 4        | 13051     | 11.9733945      | 0.355632614 | 0.021734636 | 2.694459373 |
| GO:0003746~translation elongation factor activity                                 | 8     | 0.590405904 | 0.002696061 | 1090       | 24       | 13051     | 3.991131498     | 0.420355162 | 0.025634275 | 3.33251561  |
| GO:0042393~histone binding                                                        | 11    | 0.811808118 | 0.002826456 | 1090       | 44       | 13051     | 2.993348624     | 0.435464734 | 0.025653946 | 3.491071024 |
| GO:0032403~protein complex binding                                                | 29    | 2.140221402 | 0.00346242  | 1090       | 196      | 13051     | 1.771573675     | 0.503723659 | 0.030002556 | 4.2609548   |
| GO:0030674~protein binding, bridging                                              | 17    | 1.254612546 | 0.004580104 | 1090       | 94       | 13051     | 2.165401132     | 0.604382021 | 0.037900843 | 5.600317149 |
| GO:0009374~biotin binding                                                         | 4     | 0.295202952 | 0.005095595 | 1090       | 5        | 13051     | 9.578715596     | 0.643685561 | 0.040437346 | 6.212219441 |
| GO:0033293~monocarboxylic acid binding                                            | 11    | 0.811808118 | 0.012780778 | 1090       | 54       | 13051     | 2.439024805     | 0.925604312 | 0.095105412 | 14.91241079 |
| GO:0016835~carbon-oxygen lyase activity                                           | 11    | 0.811808118 | 0.014487973 | 1090       | 55       | 13051     | 2.394678899     | 0.947554332 | 0.103434883 | 16.7413405  |
| GO:0016903~oxidoreductase activity, acting on the aldehyde or oxo group of donors | 8     | 0.590405904 | 0.01460093  | 1090       | 32       | 13051     | 2.993348624     | 0.948754712 | 0.100675941 | 16.86106648 |
| GO:0050662~coenzyme binding                                                       | 25    | 1.84501845  | 0.015696616 | 1090       | 181      | 13051     | 1.65378377      | 0.959068883 | 0.104347012 | 18.01421726 |
| GO:0019904~protein domain specific binding                                        | 40    | 2.95202952  | 0.017638799 | 1090       | 331      | 13051     | 1.446935891     | 0.972534806 | 0.112926874 | 20.02215711 |
| GO:0047485~protein N-terminus binding                                             | 13    | 0.959409594 | 0.018843036 | 1090       | 74       | 13051     | 2.103434168     | 0.978562451 | 0.116580585 | 21.24432971 |
| GO:0043023~ribosomal large subunit binding                                        | 3     | 0.221402214 | 0.019711058 | 1090       | 3        | 13051     | 11.9733945      | 0.982072119 | 0.11809302  | 22.11459372 |
| GO:0016614~oxidoreductase activity, acting on CH-OH group of donors               | 17    | 1.254612546 | 0.031290416 | 1090       | 116      | 13051     | 1.754721607     | 0.998374053 | 0.176832767 | 32.90825408 |
| GO:0051087~chaperone binding                                                      | 6     | 0.442804428 | 0.038048729 | 1090       | 23       | 13051     | 3.123494216     | 0.999604706 | 0.205837395 | 38.55349411 |
| GO:0016859~cis-trans isomerase activity                                           | 8     | 0.590405904 | 0.040246695 | 1090       | 39       | 13051     | 2.456080922     | 0.999750975 | 0.211075395 | 40.29304022 |
| GO:0002039~p53 binding                                                            | 5     | 0.36900369  | 0.047714235 | 1090       | 17       | 13051     | 3.521586616     | 0.999948596 | 0.239917178 | 45.87020123 |
| GO:0003713~transcription coactivator activity                                     | 26    | 1.918819188 | 0.053957471 | 1090       | 214      | 13051     | 1.454711481     | 0.999986387 | 0.261270865 | 50.16055951 |
| GO:0042153~RPTP-like protein binding                                              | 3     | 0.221402214 | 0.05868428  | 1090       | 5        | 13051     | 7.184036697     | 0.999995051 | 0.274925813 | 53.19815362 |
| GO:0032182~small conjugating protein binding                                      | 6     | 0.442804428 | 0.079014189 | 1090       | 28       | 13051     | 2.565727392     | 0.999999994 | 0.347097159 | 64.41904174 |
| GO:0005048~signal sequence binding                                                | 5     | 0.36900369  | 0.079768827 | 1090       | 20       | 13051     | 2.993348624     | 0.999999949 | 0.342827243 | 64.78332924 |
| GO:0003916~DNA topoisomerase activity                                             | 3     | 0.221402214 | 0.083246103 | 1090       | 6        | 13051     | 5.986697248     | 0.999999976 | 0.34833287  | 66.41799089 |
| GO:0016860~intramolecular oxidoreductase activity                                 | 7     | 0.516605166 | 0.092740036 | 1090       | 38       | 13051     | 2.205625302     | 0.999999997 | 0.373804663 | 70.53217549 |



Supplementary Table 6: List of the most enriched GO Cellular Component level 3 categories from the top most frequently detected proteins in the CRAPome

| Term                                                          | Count | %          | PValue    | List Total | Pop Hits | Pop Total | Fold Enrichment | Bonferroni  | Benjamini   | FDR        |
|---------------------------------------------------------------|-------|------------|-----------|------------|----------|-----------|-----------------|-------------|-------------|------------|
| GO:0044424~intracellular part                                 | 1226  | 90.4797048 | 1.15E-140 | 1273       | 10624    | 15283     | 1.385423716     | 3.02E-138   | 3.02E-138   | 1.51E-137  |
| GO:0044446~intracellular organelle part                       | 760   | 56.0885609 | 7.02E-139 | 1273       | 4225     | 15283     | 2.159569019     | 1.84E-136   | 9.20E-137   | 9.19E-136  |
| GO:0005622~intracellular                                      | 1233  | 90.99631   | 1.40E-130 | 1273       | 10995    | 15283     | 1.34631924      | 3.68E-128   | 1.23E-128   | 1.84E-127  |
| GO:0043232~intracellular non-membrane-bounded organelle       | 555   | 40.9594096 | 1.16E-121 | 1273       | 2596     | 15283     | 2.566660958     | 3.04E-119   | 7.61E-120   | 1.52E-118  |
| GO:0030529~ribonucleoprotein complex                          | 229   | 16.900369  | 1.62E-112 | 1273       | 515      | 15283     | 5.338367437     | 4.23E-110   | 8.47E-111   | 2.12E-109  |
| GO:0044428~nuclear part                                       | 432   | 31.8819188 | 3.41E-105 | 1273       | 1822     | 15283     | 2.84652881      | 8.93E-103   | 1.49E-103   | 4.46E-102  |
| GO:0070013~intracellular organelle lumen                      | 402   | 29.6678967 | 1.79E-89  | 1273       | 1779     | 15283     | 2.712878317     | 4.69E-87    | 6.70E-88    | 2.34E-86   |
| GO:0043233~organelle lumen                                    | 406   | 29.9630996 | 1.23E-88  | 1273       | 1820     | 15283     | 2.678149737     | 3.23E-86    | 4.04E-87    | 1.61E-85   |
| GO:0043229~intracellular organelle                            | 1063  | 78.4501845 | 3.51E-87  | 1273       | 8977     | 15283     | 1.421615823     | 9.19E-85    | 1.02E-85    | 4.59E-84   |
| GO:0005737~cytoplasm                                          | 878   | 64.797048  | 8.72E-57  | 1273       | 7319     | 15283     | 1.440200569     | 2.29E-54    | 2.29E-55    | 1.14E-53   |
| GO:0005681~spliceosome                                        | 78    | 5.75645756 | 5.62E-49  | 1273       | 132      | 15283     | 7.094158395     | 1.47E-46    | 1.34E-47    | 7.35E-46   |
| GO:0033279~ribosomal subunit                                  | 70    | 5.16605166 | 7.02E-41  | 1273       | 128      | 15283     | 6.565507168     | 1.84E-38    | 1.53E-39    | 9.18E-38   |
| GO:0005840~ribosome                                           | 90    | 6.64206642 | 1.85E-40  | 1273       | 215      | 15283     | 5.025557646     | 4.83E-38    | 3.72E-39    | 2.41E-37   |
| GO:0043231~intracellular membrane-bounded organelle           | 880   | 64.9446494 | 1.10E-37  | 1273       | 7982     | 15283     | 1.323582932     | 2.87E-35    | 2.05E-36    | 1.43E-34   |
| GO:0044444~cytoplasmic part                                   | 604   | 44.5756458 | 2.90E-33  | 1273       | 4895     | 15283     | 1.481373093     | 7.61E-31    | 5.07E-32    | 3.80E-30   |
| GO:0044430~cytoskeletal part                                  | 161   | 11.8819188 | 6.48E-19  | 1273       | 952      | 15283     | 2.030341712     | 1.70E-16    | 1.06E-17    | 8.47E-16   |
| GO:0044427~chromosomal part                                   | 88    | 6.49446494 | 2.27E-18  | 1273       | 386      | 15283     | 2.737004913     | 5.95E-16    | 3.50E-17    | 2.97E-15   |
| GO:0030530~heterogeneous nuclear ribonucleoprotein complex    | 17    | 1.25461255 | 7.58E-17  | 1273       | 17       | 15283     | 12.00549882     | 2.91E-14    | 1.67E-15    | 1.44E-13   |
| GO:0046930~pore complex                                       | 36    | 2.65682657 | 9.14E-15  | 1273       | 95       | 15283     | 4.549452185     | 2.39E-12    | 1.26E-13    | 1.19E-11   |
| GO:0005643~nuclear pore                                       | 32    | 2.36162362 | 4.11E-14  | 1273       | 79       | 15283     | 4.862986864     | 1.08E-11    | 5.38E-13    | 5.38E-11   |
| GO:0005635~nuclear envelope                                   | 53    | 3.91143911 | 1.61E-13  | 1273       | 205      | 15283     | 3.103860671     | 4.23E-11    | 2.01E-12    | 2.11E-10   |
| GO:0031967~organelle envelope                                 | 106   | 7.82287823 | 9.79E-13  | 1273       | 620      | 15283     | 2.052553024     | 2.56E-10    | 1.17E-11    | 1.28E-09   |
| GO:0000502~proteasome complex                                 | 26    | 1.91881919 | 3.79E-12  | 1273       | 61       | 15283     | 5.117097858     | 9.93E-10    | 4.32E-11    | 4.96E-09   |
| GO:0009295~nucleoid                                           | 16    | 1.18081181 | 4.92E-09  | 1273       | 31       | 15283     | 6.196386489     | 1.29E-06    | 5.37E-08    | 6.44E-06   |
| GO:0044429~mitochondrial part                                 | 87    | 6.42066421 | 2.64E-07  | 1273       | 595      | 15283     | 1.755425878     | 6.92E-05    | 2.77E-06    | 3.46E-04   |
| GO:0005852~eukaryotic translation initiation factor 3 complex | 10    | 0.73800738 | 5.88E-07  | 1273       | 15       | 15283     | 8.003665881     | 1.54E-04    | 5.93E-06    | 7.70E-04   |
| GO:0005625~soluble fraction                                   | 53    | 3.91143911 | 1.11E-06  | 1273       | 313      | 15283     | 2.032879992     | 2.90E-04    | 1.07E-05    | 0.00144894 |
| GO:0030532~small nuclear ribonucleoprotein complex            | 12    | 0.88560886 | 1.15E-06  | 1273       | 24       | 15283     | 6.002749411     | 3.01E-04    | 1.07E-05    | 0.00150321 |
| GO:0030684~preribosome                                        | 9     | 0.66420664 | 1.98E-06  | 1273       | 13       | 15283     | 8.311499184     | 5.20E-04    | 1.79E-05    | 0.00259582 |
| GO:0005832~chaperonin-containing T-complex                    | 7     | 0.51660517 | 2.14E-06  | 1273       | 7        | 15283     | 12.00549882     | 5.60E-04    | 1.87E-05    | 0.0027983  |
| GO:0031988~membrane-bounded vesicle                           | 79    | 5.8302583  | 6.82E-06  | 1273       | 568      | 15283     | 1.669778885     | 0.001785608 | 5.77E-05    | 0.00892658 |
| GO:0016585~chromatin remodeling complex                       | 19    | 1.40221402 | 1.43E-05  | 1273       | 71       | 15283     | 3.212739121     | 0.003735985 | 1.17E-04    | 0.01869421 |
| GO:0019866~organelle inner membrane                           | 51    | 3.76383764 | 2.24E-05  | 1273       | 329      | 15283     | 1.861034772     | 0.005846417 | 1.78E-04    | 0.0292839  |
| GO:0016591~DNA-directed RNA polymerase II, holoenzyme         | 20    | 1.47601476 | 2.74E-05  | 1273       | 81       | 15283     | 2.964320697     | 0.007165559 | 2.11E-04    | 0.03591393 |
| GO:0031410~cytoplasmic vesicle                                | 84    | 6.19926199 | 3.37E-05  | 1273       | 642      | 15283     | 1.57081293      | 0.008796337 | 2.52E-04    | 0.04412181 |
| GO:0005844~polysome                                           | 9     | 0.66420664 | 4.62E-05  | 1273       | 18       | 15283     | 6.002749411     | 0.012019572 | 3.36E-04    | 0.06038252 |
| GO:0031252~cell leading edge                                  | 27    | 1.99261993 | 6.30E-05  | 1273       | 138      | 15283     | 2.348901943     | 0.016382312 | 4.46E-04    | 0.0824723  |
| GO:0005839~proteasome core complex                            | 9     | 0.66420664 | 1.14E-04  | 1273       | 20       | 15283     | 5.40247447      | 0.02948591  | 7.87E-04    | 0.14938362 |
| GO:0000786~nucleosome                                         | 16    | 1.18081181 | 1.57E-04  | 1273       | 63       | 15283     | 3.049015574     | 0.040364036 | 0.001055885 | 0.20558621 |
| GO:0042995~cell projection                                    | 86    | 6.34686347 | 2.10E-04  | 1273       | 697      | 15283     | 1.481309754     | 0.053583238 | 0.001375859 | 0.27470454 |
| GO:0005853~eukaryotic translation elongation factor 1 complex | 5     | 0.36900369 | 2.23E-04  | 1273       | 5        | 15283     | 12.00549882     | 0.056766215 | 0.001424378 | 0.29148413 |
| GO:0016459~myosin complex                                     | 16    | 1.18081181 | 2.28E-04  | 1273       | 65       | 15283     | 2.95519971      | 0.057997568 | 0.001421546 | 0.29798985 |
| GO:0012505~endomembrane system                                | 92    | 6.7896679  | 6.24E-04  | 1273       | 782      | 15283     | 1.412411626     | 0.150841959 | 0.003795337 | 0.81339613 |
| GO:0000796~condensin complex                                  | 5     | 0.36900369 | 6.25E-04  | 1273       | 6        | 15283     | 10.00458235     | 0.15104583  | 0.003714676 | 0.81458572 |
| GO:0005732~small nucleolar ribonucleoprotein complex          | 8     | 0.5904059  | 8.01E-04  | 1273       | 20       | 15283     | 4.802199529     | 0.189284034 | 0.004652201 | 1.04265184 |
| GO:0031965~nuclear membrane                                   | 16    | 1.18081181 | 8.52E-04  | 1273       | 73       | 15283     | 2.631342207     | 0.200126286 | 0.004842615 | 1.10917966 |

## User manual – CRAPome version 1.1 (March 2013)

Prepared by Datta Mellacheruvu, Anne-Claude Gingras and Alexey Nesvizhskii,

### 1. Introduction

This tutorial describes the Contaminant Repository for Affinity Purification, its web interface, and related tools, collectively referred to as CRAPome ([www.crapome.org](http://www.crapome.org)). The contaminant repository contains the lists of proteins identified in negative control experiments collected using affinity purification followed by mass spectrometry (AP-MS). Original MS data for each experiment are obtained from the data creator(s), generally as .raw or mzXML/mzML files (mgf files are also accepted if raw/mzXML data cannot be obtained for any reason). MS/MS data are processed by the repository administrator using a uniform data analysis pipeline consisting of an X!Tandem database search against the RefSeq protein sequence database (*H. sapiens* data) or SGD (*S. cerevisiae*), followed by PeptideProphet and ProteinProphet analysis (part of the Trans-Proteomic Pipeline). Each experiment in the CRAPome represents a biological replicate (technical replicates, i.e. repeated LC-MS/MS runs on the same affinity purified sample, or multiple fractions as in the case of 1D SDS-PAGE separation, are combined into a single protein list). Protein identifications are mapped to genes and stored in a database along with their abundance information (spectral counts). CRAPome controls are associated with an experimental description via text-based protocols and controlled vocabularies. Users query the database via a web interface at [www.crapome.org](http://www.crapome.org), using different user workflows (described below). Some functionality in workflow 2 and workflow 3 require user registration. The database currently contains data from *H. sapiens* and *S. cerevisiae* AP-MS experiments only: as the database expands, additional species will be added. As of March 2013, the database contains ~350 experiments generated using ~75 unique protocols that were deposited by 12 laboratories.

### 2. CRAPome welcome screen

□ **Step 1: Choose Organism**

---

Choose Organism

H. sapiens ▾

Your currently selected organism is: H. sapiens

**Step 2: Choose Workflow**

---

**Workflow 1: Query Proteins (against CRAPome)**

Start | Query Proteins → View Profile

**Workflow 2: Download Background Contaminant Lists**

Start | Select Controls → Download Data

**Workflow 3: Analyze Your Data**

Start | Select Controls → Upload Data → Analyze Online → Visualize/Download Results

**Figure 2.1. CRAPome welcome screen.** The three current user workflows are displayed; select the organism and then select the desired workflow by pressing “Start”.

The users of the repository access information stored in the database by first selecting the organism (currently *H. sapiens* or *S. cerevisiae*) and then one of the three workflows shown in **Fig. 2.1**, and described in detail below. A number of additional options are available from the menu bar; visible options depend on user status

(e.g. end user, data contributor/annotator, admin). Selecting an organism sets the context and filters the data appropriately throughout the application. *H. sapiens* is selected for this tutorial.

### 3. Workflow 1: Query selected proteins

This workflow allows the user to query for selected protein(s) of interest and view their profiles across different negative control experiments.

**Step 1:** Paste a list of protein(s) or gene entries in a tab, comma or new-line separated format and click on 'submit' as shown in **Fig. 3.1** (compatible formats are shown in the figure legend).

#### Search Protein Profiles

Enter Protein Identifiers

NP\_821133  
ENSP00000319169  
11329  
PP4C\_HUMAN|  
P60510  
PPP4C

Enter a new line, space, tab, or comma-separated list of IDs.

Submit

**Figure 3.1. Protein/Gene identifiers compatible with the CRAPome.** From top to bottom: RefSeq protein ID, Ensembl protein ID, NCBI Gene ID, Uniprot entry name, Uniprot entry ID, and gene symbol are supported for *H. sapiens*. In addition to the above identifiers, systematic names as per the Saccharomyces Genome Database (referred to as SGD ID in the CRAPome; e.g. YGR192C) and the standard names as per SGD (e.g. TDH3) are also supported for *S. cerevisiae*.

**Step 2:** The query results are displayed as shown in **Fig. 3.2**.

#### Query Results

| User Input      | Mapped Gene Symbol | Num of Expt. (found/total) | Ave SC | Download as tab-delimited file |                        |
|-----------------|--------------------|----------------------------|--------|--------------------------------|------------------------|
|                 |                    |                            |        | Max SC                         | Detail                 |
| NP_821133       | TUBB               | 314 / 343                  | 31.4   | 338                            | <a href="#">detail</a> |
| ENSP00000319169 | PRMT5              | 136 / 343                  | 197.6  | 2950                           | <a href="#">detail</a> |
| 11329           | STK38              | 128 / 343                  | 48.5   | 381                            | <a href="#">detail</a> |
| PP4C_HUMAN      | PPP4C              | 3 / 343                    | 1.3    | 2                              | <a href="#">detail</a> |
| P60510          | PPP4C              | 3 / 343                    | 1.3    | 2                              | <a href="#">detail</a> |
| PPP4C           | PPP4C              | 3 / 343                    | 1.3    | 2                              | <a href="#">detail</a> |

Ave SC: Average Spectral Counts

**Figure 3.2. Query results.** The first column shows the list of entries submitted by the user, while the second column lists the Gene Symbols mapped to the entries. The third column details the number of experiments in the database in which the selected gene/protein was detected (with at least one peptide having PeptideProphet probability of 0.9 or higher); the total number of experiments in the CRAPome is also listed. The fourth and fifth columns list the averaged spectral counts and maximal spectral counts for the selected gene/protein across the experiments in which it was identified. The last column provides a link to the detailed profile for each of the selected genes/proteins. Note that this summary page can be downloaded as a tab-delimited file. From a quick survey of the results, PPP4C (protein phosphatase 4, catalytic subunit) does not appear in a high percentage of experiments (only 3 out of 343 in total), nor with high spectral counts, across the CRAPome, suggesting that it is unlikely to be a common contaminant in AP-MS studies. By contrast, TUBB (tubulin), PRMT5 (protein arginine methyltransferase 5) and STK38 (serine threonine kinase 38, also known as NDR1) are frequently detected, and often with a high number of spectral counts, indicating that they may be contaminants.

**Step 3:** When the user clicks on the ‘detail’ link, a profile of the protein (in the CRAPome repository) is shown, as in **Fig. 3.3** and **3.4**. At the top of the page are graphical summary views of the data. The profile on the left shows the abundance distribution across all experiments (i.e., how many CRAPome controls report this protein in the spectral count ranges 1-2, 3-5, 5-15, and so on; **Fig. 3.3**, left panel). If there are many experiments that report a protein in the higher spectral count ranges, one can suspect that it has a greater propensity to be a contaminant. Also shown (on the right) are the frequency of identification across groups of experiments selected based on the controlled vocabularies used to organize the data. This figure helps to provide an overview of (experimental) conditions in which this protein is likely to be a background contaminant (**Fig. 3.3**; right panel).

### Profile Detail for PRMT5

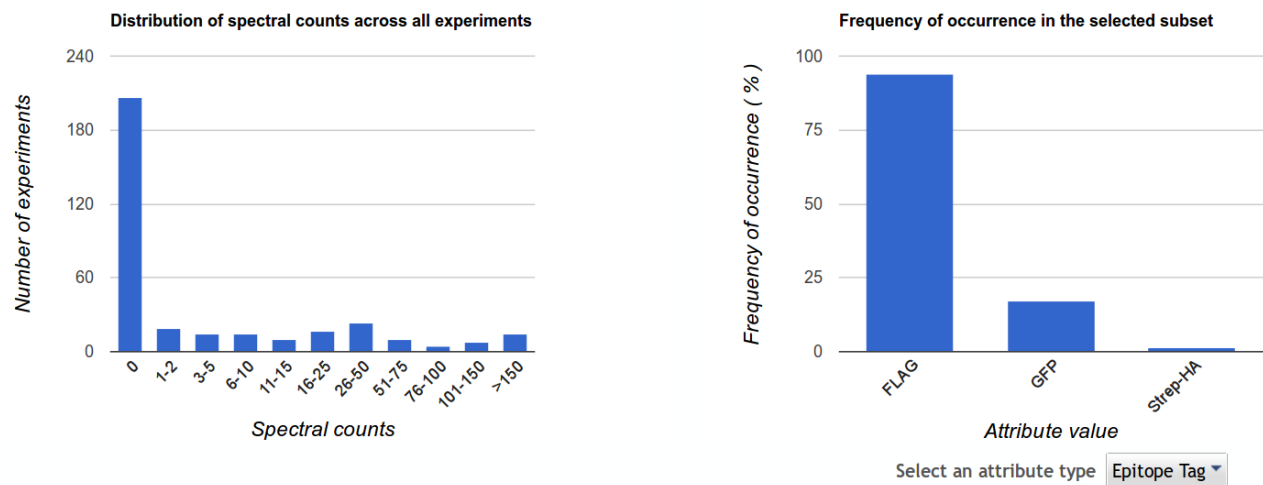

**Figure 3.3. Detailed view of PRMT5 as a contaminant across the CRAPome.** *Left:* abundance distribution of PRMT5 (spectral counts) across all experiments. While ~200 AP-MS analyses revealed no peptides for PRMT5, this protein was detected with a large spread of spectral counts across the remaining experiments. *Right:* distribution of the identification of PRMT5 across different epitope tag purifications. In this case, PRMT5 is frequently detected across FLAG purifications (94%; mouse over the bar to see the frequency listed as fraction of total, 123/131), but much less so across GFP (11/64) or Strep-HA (2/136) purifications, indicating that its contaminant propensity may be linked specifically to the FLAG epitope or the anti-FLAG antibody. Only those attribute values are shown on the plot that have at least one associated experiment in CRAPome where the queried protein was identified (e.g. PRMT5 was not identified in any TAP experiments, and thus TAP is not shown). Note that this graph can also be redrawn to show the distribution for the type of affinity support, cell line, or subcellular fractionation, to further explore contaminant behavior.

In addition to these summary views, the actual identifications of the protein in each experiment in the CRAPome repository (along with the identification scores and spectral counts) are listed below the figures in a tabular format (**Fig. 3.4**). The protein abundance distribution for each control (with protein abundances measured by their spectral counts) is also shown in a small box plot-like figure. The grey bar represents the spectral counts for the protein of interest. The background bands, from light yellow to dark orange colors, represent the 1<sup>st</sup>, 2<sup>nd</sup>, 3<sup>rd</sup> and 4<sup>th</sup> quartiles, respectively. When the grey bar representing the protein spectral counts is in the dark orange area, this protein is amongst the most abundant proteins in the corresponding CRAPome control.

□ Download as tab-delimited file

Show 10 entries Search:

| Expt. Name            | Protocol           | Epitope Tag | Cell Line | Affinity Approach | Affinity Support          | Subcellular Fractionation | Conf. Score | Spectral Count | Detail                 | Spread view legend |
|-----------------------|--------------------|-------------|-----------|-------------------|---------------------------|---------------------------|-------------|----------------|------------------------|--------------------|
| <a href="#">CC1</a>   | <a href="#">15</a> | FLAG        | HEK293    | M2 anti-FLAG      | magnetic (agarose coated) | total lysate+chromatin    | 0.9999      | 45             | <a href="#">detail</a> |                    |
| <a href="#">CC10</a>  | <a href="#">26</a> | FLAG        | HEK293    | M2 anti-FLAG      | agarose                   | total cell lysate         | 0.9999      | 92             | <a href="#">detail</a> |                    |
| <a href="#">CC108</a> | <a href="#">56</a> | FLAG        | HEK293    | M2 anti-FLAG      | agarose                   | total cell lysate         | 0.9997      | 94             | <a href="#">detail</a> |                    |
| <a href="#">CC109</a> | <a href="#">56</a> | FLAG        | HEK293    | M2 anti-FLAG      | agarose                   | total cell lysate         | 0.9997      | 88             | <a href="#">detail</a> |                    |

**Figure 3.4. Detailed view of the Experiments (column “Expt. Name”) in which PRMT5 was detected, alongside its spectral counts, linked protocol and controlled vocabularies.** The column “Conf. Score” refers to the identification of PRMT5 in the mass spectrometry experiment (the values for this score is the maximum PeptideProphet probability across all peptides mapping to that protein). Lastly, the column “Spread” shows the protein identified with the maximal spectral counts as a colored bar (separated in quartiles; max counts are shown – click on “view legends” for details) and the spectral counts for PRMT5 are shown as a grey bar. Click on the “View legend” button to see the color mapping (**Fig. 3.5**).

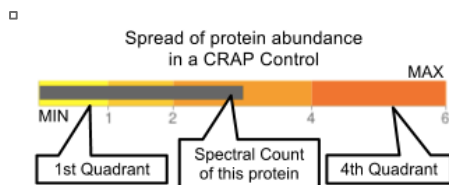

**Figure 3.5. Color-coding map of the quartile information shown in the “Spread” column of Fig. 3.4.**

The numbers in the Experiment Name and Protocol columns (as shown in **Fig. 3.4**) are hyperlinks. By clicking on these links, information about the experiment and the experimental protocol are shown in new windows as in **Fig. 3.6**.

|                                                                                                                                                                                                                                                                                                                                                                                                                                                                                                            |                                                                                                                                                                                                                                                                                                                                                                                                                                                                                                                                                                                                                                                                                                                                       |
|------------------------------------------------------------------------------------------------------------------------------------------------------------------------------------------------------------------------------------------------------------------------------------------------------------------------------------------------------------------------------------------------------------------------------------------------------------------------------------------------------------|---------------------------------------------------------------------------------------------------------------------------------------------------------------------------------------------------------------------------------------------------------------------------------------------------------------------------------------------------------------------------------------------------------------------------------------------------------------------------------------------------------------------------------------------------------------------------------------------------------------------------------------------------------------------------------------------------------------------------------------|
| <p>□ <b>Experiment #1</b></p> <p><b>Experiment Name</b></p> <p>CC1</p> <p><b>Constituent Files</b></p> <p>ACG_10435_control_benzonase_IP_1_LTQACG_25FEB2011</p> <p><b>Admin Comments</b></p> <p>ACG_10435_control_benzonase_IP_1_LTQACG_25FEB2011</p> <p><b>Protocol Name</b></p> <ul style="list-style-type: none"> <li>• 293 Flp-In FLAG mChip Orbitrap</li> </ul> <p><b>Protocol #</b></p> <p>15</p> <p><b>Attributes</b></p> <ul style="list-style-type: none"> <li>• Organism : H. sapiens</li> </ul> | <p>□ <b>Protocol #15</b></p> <p><b>Protocol Name</b></p> <p>293 Flp-In FLAG mChip Orbitrap</p> <p><b>Protocol Comments</b></p> <p>Gingras lab - version 1.0</p> <p><b>Experiments(s)</b></p> <ul style="list-style-type: none"> <li>• CC1 - ACG_10435_control_benzonase_IP_1_LTQACG_25FEB2011</li> <li>• CC4 - ACG_11302_empty_3XFLAG_chAP_Orbi_11JUN2011</li> </ul> <p><b>Attributes</b></p> <ul style="list-style-type: none"> <li>• Organism : H. sapiens</li> <li>• Cell/tissue type : HEK293</li> <li>• Cell/tissue subtype : HEK293 Flp-In T-REx</li> <li>• Drug treatment : none</li> <li>• Subcellular fractionation : total lysate+chromatin</li> <li>• Epitope tag : FLAG</li> <li>• Control protein : tag alone</li> </ul> |
|------------------------------------------------------------------------------------------------------------------------------------------------------------------------------------------------------------------------------------------------------------------------------------------------------------------------------------------------------------------------------------------------------------------------------------------------------------------------------------------------------------|---------------------------------------------------------------------------------------------------------------------------------------------------------------------------------------------------------------------------------------------------------------------------------------------------------------------------------------------------------------------------------------------------------------------------------------------------------------------------------------------------------------------------------------------------------------------------------------------------------------------------------------------------------------------------------------------------------------------------------------|

**Figure 3.6. Experiment (left) and Protocol (right) information.** Only the top of the page is show; scroll down for additional information.

By clicking on the ‘detail’ link in the Spectral Count column, more detailed information about the protein is shown, including the list of identified peptides, along with their probabilities and spectral counts (**Fig. 3.7**).

**Protein Detail**

- GI Number: 6005814
- RefSeqID : NP\_009202.1
- Gene Symbol(s): STK38
- Experiment: CC138
- Peptides:

Show  entries Search:

| Sequence           | Charge | Peptide Probability | Number Spectra |
|--------------------|--------|---------------------|----------------|
| DIKPDNLLLDISK      | 2      | 0.9984              | 6              |
| DTGHVYAMK          | 1      | 0.9939              | 5              |
| DTGHVYAMK          | 2      | 0.9985              | 4              |
| DWVFINYTYK         | 2      | 0.9853              | 12             |
| ETLTFPPEVPISEK     | 2      | 0.9973              | 22             |
| FC[160]C[160]EWEHR | 2      | 0.9925              | 4              |
| IGAPGVVEIHK        | 1      | 0.9432              | 1              |
| IGAPGVVEIHK        | 2      | 0.9989              | 20             |
| LGLEDFESLK         | 2      | 0.9989              | 38             |
| LSDFGLC[160]TGLK   | 2      | 0.9989              | 50             |

Showing 1 to 10 of 17 entries ◀ Previous Next ▶

**Figure 3.7. Peptide summary view for a selected protein (STK38) in one experiment (CC138)**

The summary table can be downloaded as an Excel-compatible table (**Fig. 3.7**).

|   | A     | B      | C      | D       | E       | F        | G       | H        | I        | J       | K        | L          | M        | N                 | O               | P           | Q              | R          |
|---|-------|--------|--------|---------|---------|----------|---------|----------|----------|---------|----------|------------|----------|-------------------|-----------------|-------------|----------------|------------|
| 1 | id    | ipName | protID | numSpec | exptSum | exptFreq | exptMin | expt2ndQ | expt3rdQ | exptMax | protocol | epitopeTag | cellLine | affinitySupport   | subcellularFrac | proteinProb | maxUniqPepProb | maxIniProb |
| 2 | 81608 | CC189  | PRMT5  | 2950    | 10077   | 137      | 1       | 60       | 24       | 2950    | 66 FLAG  | HEK293     | agarose  | total cell lysate | 0.9998          | 0.9998      | 0.9998         |            |
| 3 | 83271 | CC192  | PRMT5  | 2853    | 10744   | 137      | 0       | 68       | 26       | 2853    | 66 FLAG  | HEK293     | agarose  | total cell lysate | 0.9998          | 0.9998      | 0.9998         |            |
| 4 | 81480 | CC190  | PRMT5  | 2830    | 9861    | 137      | 1       | 70       | 26       | 2830    | 66 FLAG  | HEK293     | agarose  | total cell lysate | 0.9998          | 0.9998      | 0.9998         |            |
| 5 | 81060 | CC191  | PRMT5  | 2521    | 7887    | 137      | 0       | 46       | 15       | 2521    | 66 FLAG  | HEK293     | agarose  | total cell lysate | 0.9998          | 0.9998      | 0.9998         |            |

**Figure 3.8. Summary table.** The columns are as follows: A) ID (a unique identifier for the detection of a given protein across the database; B) ipName, the unique identifier for the experiment in the CRAPome; C) protID, the mapped Official Gene Symbol; D) numSpec, the spectral counts associated with PRMT5 in the experiment; E) exptSum, the sum of all spectra assigned in the experiment; F) exptFreq, how often PRMT5 has been detected across the CRAPome; G-J) quartiles (defined by their spectral count boundaries); K) protocol used for the experiment; L-O) Selected controlled vocabulary values; P-R) protein probability scores.

#### 4. Workflow 2: Create contaminant lists

This workflow allows the user to download subsets of data from the CRAPome repository. Each control experiment (CRAPome Control, or CC) is assigned a unique identifier (CC1-CCx), linked to a protocol, and annotated with standard vocabulary (such as the epitope tag type, cell line, affinity matrix, etc.). These attributes can be used to filter the list of available CRAPome controls. These filters are available on the left as shown in **Fig. 4.1**.

**Step 1:** Use the filters on the left (**Fig. 4.1**) to narrow down the list of negative controls.

**Step 2:** “Add” each desired CRAPome control of interest by clicking the button in the table. If desired, select the “Add All” button instead. Added controls will appear in the “Selected controls” box on the right. *There is a limit of 30 controls that can be selected at the same time.* A link at the top of the home page provides an option to download the entire database content as a tab-delimited text.

**Step 3 (optional):** Give this list of selected controls a name and save it for future use (note that this option is restricted to registered users). If you wish to reload a previously saved list, you can do so by clicking the “load” link.

**Workflow Navigation**

Select Controls
View/Download Data Matrix
NEXT >

Your current organism is: *H. sapiens* (choose another)

**Filters**

- Cell/tissue type [+]
- Subcellular fractionation [+]
- Epitope tag [-]
- FLAG
- HA
- GFP
- TAP
- HaloTag
- Strep-HA
- Affinity approach 1 [+]
- Affinity support 1 [+]
- Affinity approach 2 [+]

**Select Controls**

| Name  | Num Preys | Protocol Number | Tag     | Fractionation     | Cell Line | Affinity Approach 1 | Affinity Support 1 |                   |
|-------|-----------|-----------------|---------|-------------------|-----------|---------------------|--------------------|-------------------|
| CC51  | 195       | 47              | HA      | total cell lysate | HEK293    | HA-7 anti-HA        | agarose            | Add All<br>Remove |
| CC52  | 184       | 47              | HA      | total cell lysate | HEK293    | HA-7 anti-HA        | agarose            | Add               |
| CC53  | 379       | 47              | HA      | total cell lysate | HEK293    | HA-7 anti-HA        | agarose            | Add               |
| CC54  | 243       | 47              | HA      | total cell lysate | HEK293    | HA-7 anti-HA        | agarose            | Add               |
| CC229 | 84        | 60              | HaloTag | total cell lysate | HEK293    | HaloLink            | agarose            | Add               |
| CC230 | 179       | 60              | HaloTag | total cell lysate | HEK293    | HaloLink            | agarose            | Add               |
| CC232 | 142       | 60              | HaloTag | total cell lysate | HEK293    | HaloLink            | agarose            | Add               |

**Selected Controls**

CC51 remove

---

myList

enter a list name

myList

list comments

---

**Saved Controls Lists**

myList load del

**Figure 4.1. Selection of CRAPome controls in User Workflow 2.** *Left panel:* available controlled vocabularies to filter the list of controls (selecting different options across categories is equivalent to an “and” function; selecting multiple boxes within a category corresponds to an “or” function, as shown here with the selection of HA tag and HaloTag experiments from the database). *Middle:* table of the controls that passed the selected filters. Clicking on the control name (first column) or the protocol name (third column) displays extended information. The second column lists the number of proteins identified in each of the controls. A limited view of the controlled vocabularies is shown in columns 4-8. Controls are added to the list by clicking on the “Add” or “Add All” buttons in the last column (note that added controls can also be manually removed). Alternatively, controls can be added by loading a previously saved list (*right, bottom*). Once the desired controls are selected, the data table can be generated by pressing the blue “Next” button at the top right of the page.

**Step 4:** Click on “Next” button at the top of the page to view and/or download the data matrix (**Fig. 4.2**). The data matrix can be downloaded as an Excel compatible table using the “download data matrix” option.

**Step 5 (optional):** Specific proteins can be queried in the data matrix by typing partial or complete gene name (wild cards are automatically added at the beginning and end).



**Workflow Navigation**

Select Controls → View/Download Data Matrix

Your current organism is: H. sapiens (choose another)

### View / Download Data

Show  entries
[Download data matrix](#)

Search:

| GENE  | REFSEQ_ID              | UNIPROT_ID | AVE_SC | NUM_EXPT | CC51 | CC52 | CC53 | CC54 |
|-------|------------------------|------------|--------|----------|------|------|------|------|
| ACTA1 | NP_001091              | ACTS_HUMAN | 2.5    | 4        | 3    | 2    | 4    | 1    |
| ACTA2 | NP_001135417;NP_001604 | ACTA_HUMAN | 3      | 3        | 3    | 2    | 4    | 0    |

Showing 1 to 2 of 2 entries (filtered from 463 total entries) ◀ Previous Next ▶

**Figure 4.2. Detailed table output for the User Workflow 2 – limited for search term “ACTA” across all experiments selected based on “Epitope tag = HA” in the previous step.** The complete list of the proteins identified across the selected CRAPome controls is shown by default. It can be also restricted to a selected search term (here: “ACTA”). NUM\_EXPT is the number of experiments (among the experiments selected in the previous step) in which the protein was identified (4 and 3 experiments for ACTA1 and ACTA2, respectively). Also shown are the averaged spectral counts (AVE\_SC) across the experiments in which the protein was identified, and the spectral counts in each of the selected experiments (CC51, CC52, CC53, CC54; highlighted in pink cells). Mapped IDs (RefSeq ID and Uniprot ID) are also provided in the table.

## 5. Workflow 3: Use the CRAPome to analyze your data.

This workflow allows the user to process his/her data online using the CRAPome controls and the scoring tools implemented within the system. This workflow is only available to registered users. The minimum requirement is for the user to submit information regarding one bait (one sample), though we strongly advocate the use of biological replicates for the bait, and recommend that the user also uploads his/her own negative control runs.

**Step 1:** Select the CRAPome database controls that are most similar to the user data using controlled vocabularies and detailed protocols as shown for workflow 2 above (see **Fig. 4.1**). Selected controls can be saved as a list and reloaded as needed as in workflow 2. Press the blue “Next” button to navigate to the next page.

**Step 2:** Upload user data (See **Fig. 5.1**). The data should be formatted as per instructions on the webpage (also see **Fig. 5.2**). Once uploaded, the data appear in the ‘user data’ section below.

**Step 3 (optional):** If the user would like to exclude some of his/her data from the analysis, it can be done at this stage by clicking on ‘remove’ button. Similarly, one can go back and add/remove CRAPome controls. For a quick preview of the data matrix, click on ‘Preview Data Matrix’. After the analysis is complete, the data can be deleted by clicking on ‘clear uploaded user data’ (See **Fig. 5.1**).

**Step 4:** Proceed to the analysis section by clicking on ‘Next’. Here, Fold Change calculations and SAINT probability scoring can be used to generate ranked lists of bait-prey interactions.



## Upload Data

Choose File to Upload

The data should be formatted as a comma-separated list (CSV) ([click here for example](#)) consisting of four columns: 1) Bait Name; 2) AP Name; 3) Prey Name; 4) Spectral Counts. Negative control analyses should be labeled "CONTROL" in the "Bait Name" column. The "Prey Name" can be either a protein RefSeq ID, a UniProt ID, an Ensembl ID or an Official Gene Symbol (as per NCBI); note that for mapping purposes, we strongly suggest also using one of these identifiers for the "Bait Name". Different "AP Names" will automatically be merged for analysis if they are assigned to the same "Bait Name".

NOTE: Uploading new user data deletes any existing data; a maximum number of 10,000 rows is allowed.

[clear uploaded user data](#)

**User Data**

| Baits   | AP Name      | Prey Count |                                        |
|---------|--------------|------------|----------------------------------------|
| CONTROL | BRD_ZL       | 441        | <input type="button" value="exclude"/> |
| MEPCE   | 7633_MEPCE   | 413        | <input type="button" value="exclude"/> |
| MEPCE   | 7594_MEPCE   | 396        | <input type="button" value="exclude"/> |
| CONTROL | 1A2_FLAG     | 362        | <input type="button" value="exclude"/> |
| EIF4A2  | 7701_EIF4... | 337        | <input type="button" value="exclude"/> |
| CONTROL | 1A_FLAG      | 331        | <input type="button" value="exclude"/> |
| RAF1    | 7576_RAF1    | 324        | <input type="button" value="exclude"/> |

**CRAP Controls**

|       |                                  |     |                                       |
|-------|----------------------------------|-----|---------------------------------------|
| CC32  | 293 Flp-In FLAG agarose LTQ - AA | 694 | <input type="button" value="remove"/> |
| CC33  | 293 Flp-In FLAG agarose LTQ - AA | 648 | <input type="button" value="remove"/> |
| CC108 | HEK293_FLAG_MudPIT_LCQ           | 215 | <input type="button" value="remove"/> |
| CC109 | HEK293_FLAG_MudPIT_LCQ           | 234 | <input type="button" value="remove"/> |
| CC110 | HEK293_FLAG_MudPIT_LCQ           | 265 | <input type="button" value="remove"/> |
| CC111 | HEK293_FLAG_MudPIT_LCQ           | 465 | <input type="button" value="remove"/> |
| CC112 | HEK293_FLAG_MudPIT_LCQ           | 174 | <input type="button" value="remove"/> |
| CC113 | HEK293_FLAG_MudPIT_LCQ           | 135 | <input type="button" value="remove"/> |
| CC114 | HEK293_FLAG_MudPIT_LCQ           | 182 | <input type="button" value="remove"/> |

**Figure 5.1. Upload user data.** The top of the page enables browsing to upload the user data prepared in a comma-separated values (CSV) file (see [Fig. 5.2](#)). The table should not have headers and should consist of four columns: 1) Bait Name; 2) AP Name (the name you are giving to this particular affinity purification); 3) Prey Name; 4) Spectral Counts. Negative control analyses should be labeled "CONTROL" in the "Bait Name" column. The "Prey Name" can be either a RefSeq protein ID, Ensembl protein ID, Uniprot entry name, Uniprot entry ID or gene symbol (SGD systematic gene name or standard name for *S. cerevisiae*). For mapping purposes, we strongly suggest also using one of these identifiers for the "Bait Name". Different "AP Names" will automatically be merged for analysis if they are assigned to the same "Bait Name". The bottom left of the page lists the User data that was uploaded while the bottom right lists the selected CRAPome controls.

|   | A    | B         | C         | D   |
|---|------|-----------|-----------|-----|
| 1 | RAF1 | 7626_RAF1 | NP_006752 | 406 |
| 2 | RAF1 | 7576_RAF1 | NP_006752 | 398 |
| 3 | RAF1 | 7576_RAF1 | NP_002871 | 388 |

**Figure 5.2. Sample column format for upload.** Column A is the BAIT name, column B the identifier for the experiment (AP name), column C the PREY identifier (here RefSeq protein ID) and column D is the spectral count for the PREY in the AP.

**Step 5:** Select desired scoring options for Fold Change calculations ([Fig. 5.3](#)). Two different Fold Change calculations are generated by default. The first one (FC-A; standard) estimates the background by averaging the spectral counts across the selected controls while the second one (FC-B; stringent) estimates the background by combining the top 3 values for each prey. Combining scores from biological replicates of a bait purification is performed in FC-A by a simple averaging, while FC-B performs a more stringent geometric mean calculation. These parameters are preselected by default, but may be modified by the user as required. The user can also specify what set of controls to use (user controls alone or in combination with selected CRAPome controls). A series of worked examples of the use of the CRAPome for scoring interactions is made available on the CRAPome site, under "Supplementary data".

**Step 6 (optional):** The user can specify whether to run SAINT or not, and which SAINT options ('lowMode', 'minFold', 'norm') should be employed. Briefly, "lowMode" is an option useful when looking at interconnected datasets (i.e. datasets in which the baits share interactors). In the "lowMode" default setting ("off"), interactions which are detected with multiple baits are penalized, since SAINT expect them to be frequent fliers. Turning lowMode "on" partially alleviates this penalty, enabling more

sensitive detection. “minFold” defines the quantitative separation (minimum quantitative fold change) between the test samples and the controls before an interaction is deemed significant. In the default “minFold = on” setting, a minimum 10 fold separation rule between false and true interaction distributions is enforced; this increases the stringency of the filtering, especially towards proteins which are frequently detected across the negative control runs used in the modeling. Finally, “norm” is a normalization step, which takes into account the total number of spectra identified in an experiment (typically, negative controls have less such counts than a test experiments, and “norm = on” is therefore conservative in that it relatively boosts the quantitative values for the controls as compared to the test samples). For additional details regarding SAINT and the options, please refer to the Choi et al., Current Protocols in Bioinformatics (PMID 22948730 – a pdf version of the SAINT protocol paper is provided in the “Supplementary data” section of the CRAPome). As with the Fold Change calculations, the user may select which controls to use, and how replicates should be combined. Note that if the number of controls is greater than 10, SAINT generates 10 “virtual controls” by selecting the 10 highest counts for each protein. This accelerates the data processing, but also provides a more conservative analysis of the dataset.

**Analysis Options**

**FC (Empirical) Score** ⓘ

**Primary Score (FC-A):**

Choice of Controls:  Background Estimation:

Combining Replicates:

**Secondary Score (FC-B):**

Choice of Controls:  Background Estimation:

Combining Replicates:

**SAINT (Probability) Score** ⓘ

**SAINT Options**

Choice of Controls:  SAINT-Specific Options: n-burn:  n-iter:

NOTE: If the number of controls is greater than 10, SAINT generates 10 virtual controls by selecting the 10 best counts for each protein. LowMode:  MinFold:  Normalize:

SAINT is computationally intensive. Please wait 3-5 minutes for the processing to complete. You can “Refresh” to see the current status of the job.

Combining Replicates:

**Figure 5.3. Interface for data analysis using CRAPome.** The left panel displays the interface for running the Fold Change empirical score; the CRAPome automatically generates two FC-scores as part of the analysis, the second one being designed as a more stringent score by default. Parameters can be modified as described above. The right panel displays the optional SAINT scoring, associated with model options.

**Step 6:** Once the desired options are selected, press “Run Analysis”. The new entry will appear at the top of the ‘Analysis Results’ list (the list includes all previous jobs run by the user). Initially, the Status (last column) of the new job will be shown as ‘queued’ (followed by ‘running’ and then ‘complete’). The column “Score Options” lists selected options for the Fold Change calculations for both the primary (FC-A; here labeled S1) and the secondary, more stringent (FC-B, here labeled S2) scores. SAINT options (when applicable) are listed in the next column.

**Analysis Results**

| Job ID | Date                | Score Options                        | SAINT Options                             | Status   | Actions                                             |
|--------|---------------------|--------------------------------------|-------------------------------------------|----------|-----------------------------------------------------|
| 682    | 2012-12-07 14:59:56 | S1 (user,default); S2(all,stringent) | C(User);iter(2000,4000); LM=0,MF=0,Norm=1 | complete | <a href="#">view results</a> <a href="#">delete</a> |
| 681    | 2012-12-07 14:55:48 | S1 (user,default); S2(all,stringent) | C(User);iter(2000,4000); LM=0,MF=0,Norm=1 | complete | <a href="#">view results</a> <a href="#">delete</a> |
| 666    | 2012-12-06 16:05:41 | S1 (user,default); S2(all,stringent) | -                                         | complete | <a href="#">view results</a> <a href="#">delete</a> |

**Figure 5.4. Job status.** This table lists all analyses performed by the user, alongside the selected options for the scoring.

**Step 7:** Refresh the web page periodically by clicking on 'Refresh'. When the job is finished and the results are ready to be viewed, the Status will change to 'complete'. A link called 'view results' will appear. The user will also receive an email notification with a link to the results page.

**Step 8:** Click on 'view results' link to view the results. At the top of the page, you will see graphical views of the data that summarize the results for each of the baits analyzed, or for all baits at once. The left panel compares SAINT (when run) to FC-A; when SAINT is not used, this panel displays a comparison between FC-A and FC-B (see Fig. 5.5). In both cases, the left panel describes the Receiver Operating Characteristic (ROC) analysis of the scoring (benchmarked to the interactions reported in iRefIndex). This visualization can assist in deciding which scoring function to use on the data. The middle panel displays a histogram of the interactions reported in iRefIndex versus those not reported, at different bins of SAINT probability or FC-A score when SAINT was not run. Finally, the panel on the right compares two different scores (by default, SAINT and FC-B if SAINT is used; FC-A vs. FC-B otherwise) at the level of individual proteins. Mousing over any of the graphs will display relevant information (e.g. gene names).

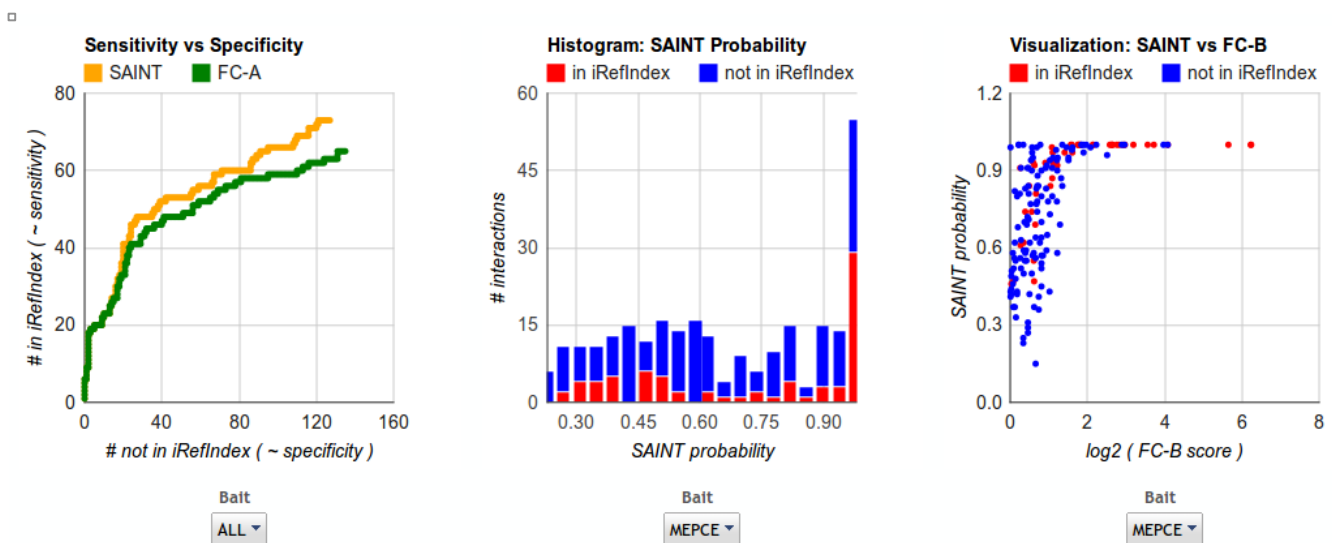

**Figure 5.5. Graphical views of the data.** Three different graphs are drawn for each analysis. Color coding on the middle and right graphs corresponds to the information present (red) or absent (blue) from the iRefIndex. When more than one bait was employed, use the dropdown menu below each graph to generate figures for the individual baits, or for all baits combined.

**Step 9:** The results can be viewed online in a matrix form or downloaded in a tabular format (see Fig. 5.6)

Baits in this data: B1 = EIF4A2, B2 = MEPCE, B3 = RAF1, B4 = WASL

|                                                                                                                                                                  |                                                                                                                                                                            |
|------------------------------------------------------------------------------------------------------------------------------------------------------------------|----------------------------------------------------------------------------------------------------------------------------------------------------------------------------|
|  Bi_SP: SAINT Probability of proteins co-purifying with bait <i>i</i>           |  Bi_Rj: Spectral counts of proteins co-purifying with bait <i>i</i> in replicate <i>j</i> |
|  Bi_FC_A: Primary FC Score (FC-A) of proteins co-purifying with bait <i>i</i>   |  UCx: Spectral counts of proteins in user control <i>x</i>                                |
|  Bi_FC_B: Secondary FC Score (FC-B) of proteins co-purifying with bait <i>i</i> |  CCy: Spectral counts of proteins in CRAPome control <i>y</i>                             |
|  Bi_IREF: Interactions report (1: in iRefIndex, 0: not in iRefIndex)            |                                                                                                                                                                            |

TIP: Mouse over the header names to see the full bait names.

Download results: [list](#), [matrix](#)

[Download raw SAINT results](#)

Show  entries

Search:

| PROTID       | GENENAMES | B1_FC_A | B1_FC_B | B1_SP | B1_IREF | B2_FC_A | B2_FC_B | B2_SP | B2_IREF | B3_FC_A | B3_FC_B | B3_SP |
|--------------|-----------|---------|---------|-------|---------|---------|---------|-------|---------|---------|---------|-------|
| NP_001958    | EIF4A2    | 196.42  | 47.53   | 1     | 1       | 1.03    | 0.26    | 0     | 0       | 0.85    | 0.22    | 0     |
| NP_001407    | EIF4A1    | 79.35   | 22.36   | 1     | 0       | 0.78    | 0.23    | 0     | 1       | 0.65    | 0.19    | 0     |
| NP_886553    | EIF4G1    | 42.17   | 26.74   | 1     | 1       | 0       | 0       | 0     | 0       | 0.58    | 0.39    | 0     |
| NP_001186421 | PDCD4     | 34.75   | 30.88   | 1     | 1       | 0       | 0       | 0     | 0       | 0       | 0       | 0     |
| NP_001185730 | EIF4G3    | 33.98   | 30.54   | 1     | 1       | 0       | 0       | 0     | 0       | 0       | 0       | 0     |
| NP_001166176 | EIF4G2    | 27.92   | 25.56   | 1     | 1       | 0       | 0       | 0     | 0       | 0       | 0       | 0     |
| NP_003749    | EIF3J     | 19.36   | 17.46   | 1     | 0       | 0       | 0       | 0     | 0       | 0       | 0       | 0     |
| NP_004629    | PRRC2A    | 19.34   | 17.78   | 1     | 0       | 0       | 0       | 0     | 0       | 0       | 0       | 0     |
| NP_001559    | EIF3E     | 16.97   | 11.17   | 1     | 0       | 0       | 0       | 0     | 0       | 0.35    | 0.25    | 0     |
| NP_003741    | EIF3A     | 16.04   | 11.93   | 1     | 1       | 0       | 0       | 0     | 0       | 0.23    | 0.18    | 0     |

Showing 1 to 10 of 742 entries

◀ Previous Next ▶

**Figure 5.6. Results table.** Preys are listed in rows. The columns are as follows: PROTID, the protein name in the upload file; GENENAMES, the mapped Gene Name. The rest of the columns describe the data: B1 indicates Bait 1 (in this case, EIF4A2). FC\_A and FC\_B are Fold Changes A and B, respectively; SP is the SAINT probability, and IREF denotes an interaction reported in iRefIndex (1 = reported; 0 = not reported). The table has many more columns than can fit in this window, including spectral counts for every replicate (R1 is replicate 1) of a bait purification, and for every selected control. The table can be downloaded in matrix and list formats (compatible with Cytoscape). SAINT results files can also be downloaded.

## Annotator Manual – CRAPome version 1.0

Prepared by Datta Mellacheruvu; Edited by Anne-Claude Gingras, December 2012

### 1: Overview

The CRAPome is a repository of negative controls performed in affinity purification coupled with mass spectrometry (AP-MS) experiments. Negative controls are collected from various studies (published or unpublished), processed, annotated and made available for download and analysis via an online interface. See User Manual for details.

An Annotator is usually the contributor of mass spectrometry data to the CRAPome. Contributors first submit raw mass spectrometry files to the CRAPome administrator. The administrator processes them to yield protein identifiers and spectral counts, assigns an experiment number to each of the files that passed a quality control step (these experiments are labeled CCx; CRAPome Control x), and releases them for annotation. The Annotator defines protocols to describe the experimental procedures and links the protocols to each experiment. Protocols include controlled vocabularies and free text.

### 2. Accessing the system as an Annotator and viewing existing experiments and protocols

Annotators are assigned a higher level of privileges than regular registered users. They can create protocols and link protocols to experiments. Annotator-level login access can be requested by emailing the CRAPome administrator. Use the login credentials to enter the CRAPome (**Fig. 2.1**). The Annotator menu bar will look like **Fig. 2.2**.

**Figure 2.1.** Welcome screen at the [www.CRAPome.org](http://www.CRAPome.org) database. Enter username and password as prompted.

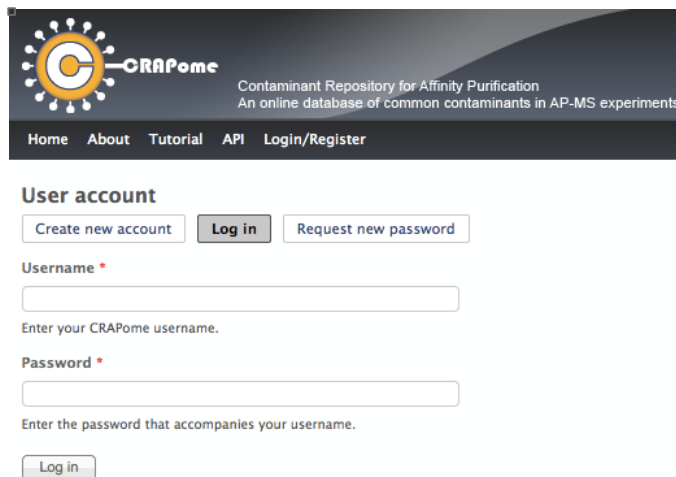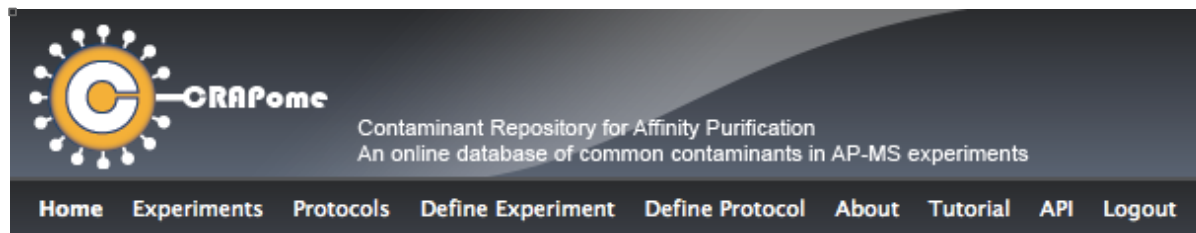

**Figure 2.2. Annotator menu bar.** “Experiments” lists all the experiments that the annotator has access to (those that have been contributed by their laboratory). “Protocols” lists all the protocols in the CRAPome, but enables editing only those protocols belonging to the Annotator. “Define Experiment” and “Define Protocol” enable the creation of new data.

Select the “Experiments” tab to view the list of all experiments contributed by the Annotator laboratory (**Fig. 2.3**). Click on an Experiment Name (here CC40) to view the associated details (**Fig. 2.4**). Similarly, select the “Protocols” tab to view the list of all protocols available in the CRAPome (only those protocols contributed by the Annotator laboratory can be edited; **Fig. 2.5**). Clicking on the name or protocol number opens a new window with the protocol details (**Fig. 2.6**).

CRAPome  
Contaminant Repository for Affinity Purification  
An online database of common contaminants in AP-MS experiments

Home Experiments Protocols Define Experiment Define Protocol About Tutorial Logout

### View Experiments

| Name | Prey Count | File Name                               | Protocol(s)                       | Tag  | Fraction                 |        | Click here to edit/annotate                    |
|------|------------|-----------------------------------------|-----------------------------------|------|--------------------------|--------|------------------------------------------------|
| CC40 | 486        | ACG_FLAG_Trex293_MAG_9560               | 293 Flp-In FLAG mag LTQ           | FLAG | total cell lysate        | HEK293 | magnetic (agarose coated) <a href="#">edit</a> |
|      |            | HeLa_chAP1_Orbi_11JUN2011               |                                   |      |                          | HeLa   | magnetic (agarose coated) <a href="#">edit</a> |
| CC22 | 343        | ACG_2276_MK_1_Flag_control_20090427     | 293 stables FLAG agarose LTQ -... | FLAG | total cell lysate        | HEK293 | agarose <a href="#">edit</a>                   |
| CC28 | 404        | ACG_3XFLAG_empty_chAP_LTQMT_07MAY2011   | 293 Flp-In FLAG mChip LTQ         | FLAG | total lysate + chromatin | HEK293 | magnetic (agarose coated) <a href="#">edit</a> |
| CC8  | 644        | ACG_11687_empty_3XFLAG_LTQACG_27JUL2011 | 293 Flp-In FLAG mChip LTQ         | FLAG | total lysate + chromatin | HEK293 | magnetic (agarose coated) <a href="#">edit</a> |
| CC41 | 290        | ACG_FLAG_Trex293_MAG_9561               | 293 Flp-In FLAG mag LTQ           | FLAG | total cell lysate        | HEK293 | magnetic (agarose coated) <a href="#">edit</a> |
| CC51 | 195        | ACG_HA_Hek293_AGA_9091                  |                                   |      |                          |        | <a href="#">edit</a>                           |

**Figure 2.3. Experiment View.** The procedure for creating and editing protocols will be described in section 3.

|                                                 |
|-------------------------------------------------|
| <b>Experiment #40</b>                           |
| <b>Experiment Name</b>                          |
| CC40                                            |
| <b>Constituent Files</b>                        |
| ACG_101027_f-GFP_G5_HU_MB2_BGB                  |
| <b>Protocol Name</b>                            |
| • 293 Flp-In FLAG mag LTQ                       |
| <b>Protocol #</b>                               |
| 20                                              |
| <b>Attributes</b>                               |
| • Organism : human                              |
| • Cell/tissue type : HEK293                     |
| • Cell/tissue subtype : HEK293 Flp-In T-REx     |
| • Drug treatment : none                         |
| • Subcellular fractionation : total cell lysate |
| • Epitope tag : FLAG                            |

**Figure 2.4. Experiment details.** Only the top portion of the Experimental details view is shown.

CRAPome  
Contaminant Repository for Affinity Purification  
An online database of common contaminants in AP-MS experiments

Home Experiments Protocols Define Experiment Define Protocol About Tutorial Logout

### View Protocols

| Prot. ID | Prot. Name                              | Comments                                  | Epitope Tag | Fractionation | Cell Line | Action*              |
|----------|-----------------------------------------|-------------------------------------------|-------------|---------------|-----------|----------------------|
| 14       | 293 Flp-In FLAG mChip LTQ               | Gingras lab - version 1.0                 | FLAG        | 1D LC-MS      | HEK293    | <a href="#">edit</a> |
| 15       | 293 Flp-In FLAG mChip Orbitrap          | Gingras lab - version 1.0                 | FLAG        | 1D LC-MS      | HEK293    | <a href="#">edit</a> |
| 16       | 293 Flp-In FLAG mChip Orbitrap          | Gingras lab - version 1.0                 | FLAG        | 1D LC-MS      | HEK293    | <a href="#">edit</a> |
| 21       | 293T transient FLAG LTQ                 | Gingras lab - version 1.0                 | FLAG        | 1D LC-MS      | HEK293    | <a href="#">edit</a> |
| 22       | 293T transient GFP LTQ                  | Pawson lab protocol                       | GFP         | 1D LC-MS      | HEK293    | -                    |
| 23       | 293T transient GFP LTQ                  | Pawson lab protocol                       | GFP         | 1D LC-MS      | HEK293    | -                    |
| 24       | 293 stables FLAG agarose LTQ - GC       | Gingras lab - version 1.0; Ginny Chen     | FLAG        | 1D LC-MS      | HEK293    | <a href="#">edit</a> |
| 25       | 293 Flp-In FLAG agarose LTQ - MM        | Gingras lab - version 1.0; Michael Mullin | FLAG        | 1D LC-MS      | HEK293    | <a href="#">edit</a> |
| 26       | 293 Flp-In FLAG agarose LTQ - AA        | Durocher lab                              | FLAG        | 1D LC-MS      | HEK293    | -                    |
| 27       | HeLa Flp-In FLAG mChip LTQ              |                                           | FLAG        | 1D LC-MS      | HeLa      | <a href="#">edit</a> |
| 28       | HeLa Flp-In FLAG mChip Orbitrap         | Gingras lab - version 1.0                 | FLAG        | 1D LC-MS      | HeLa      | <a href="#">edit</a> |
| 29       | 293 Flp-In pools FLAG magnetic LTQ - AC | Gingras lab - version 2.0 - Amber Couzens | FLAG        | 1D LC-MS      | HEK293    | <a href="#">edit</a> |
| 32       | example protocol                        | This is an example Protocol.              | FLAG        | 1D LC-MS      | HEK293    | <a href="#">edit</a> |

\*NOTE: Deletion is only permitted for administrators on unassociated protocols.

Figure 2.5. Protocol View. The procedure for creating and editing protocols will be described in section 3.

#### □ Protocol #14

##### Protocol Name

293 Flp-In FLAG mChip LTQ

##### Protocol Comments

Gingras lab - version 1.0

##### Experiments(s)

- CC2 - ACG\_10783\_empty\_3XFLAG\_chAP\_LTQACG\_08APR2011
- CC3 - ACG\_10986\_empty\_3xFLAG\_chAP\_3\_LTQMT\_07MAY2011
- CC8 - ACG\_11687\_empty\_3XFLAG\_LTQACG\_27JUL2011
- CC28 - ACG\_3XFLAG\_empty\_chAP\_LTQMT\_07MAY2011

##### Attributes

- Organism : human
- Cell/tissue type : HEK293
- Cell/tissue subtype : HEK293 Flp-In T-REx
- Drug treatment : none

Figure 2.6. Protocol Details. Only the top portion of the Experimental details view is shown.

## 3. Creating and editing protocols and experiments

The main responsibility of the Annotator is to define Protocols and link Experiments to the protocols. An annotator can also edit protocols and experiments that belong to their research group. Fig. 3.1 summarizes the different steps of the annotation process.



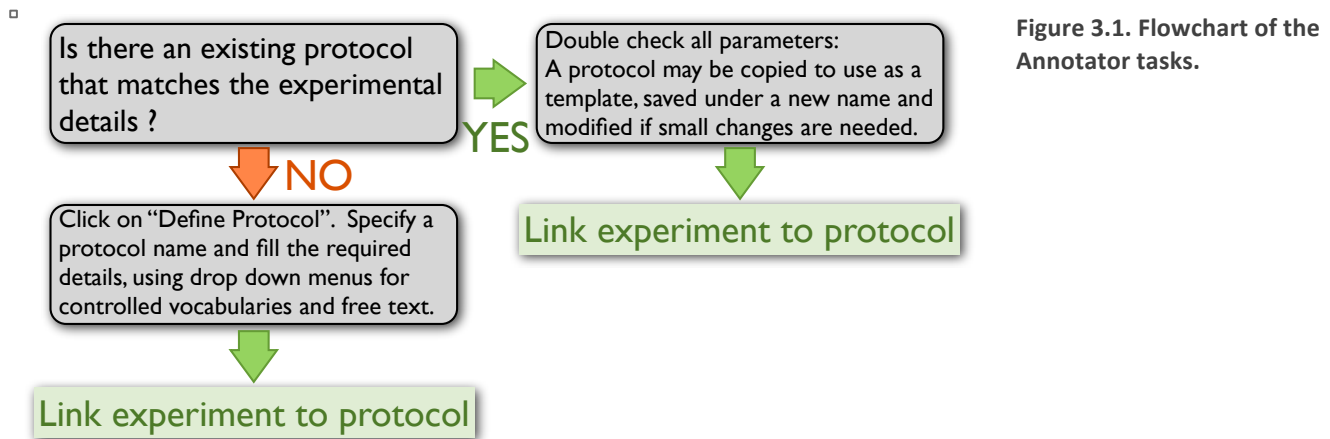

### Task 1: Define/Edit Protocol

The first task of the Annotator is to define a protocol that corresponds to the experiments to be annotated. Create a new protocol by clicking the “Define Protocol” tab: Fill in the requested information, including a descriptive name for the protocol associated with optional protocol notes. Select the controlled vocabulary by using the drop down “Attributes” (Fig. 3.2; See Fig. 3.3 for current CV terms; contact the CRAPome administrator if the controlled vocabulary is inadequate), and add text-based experimental details (see Fig. 3.4 for an example). Before creating a new protocol, review the list of the existing protocols to prevent duplication. Note, however, that since even minor changes in experimental procedures can lead to observable changes in the composition of the background contaminants, new protocols should be created that fully describe protocol details without creating obvious redundancies.

**Figure 3.2. Creating a new CRAPome protocol / part A, define controlled vocabulary.**

**CRAPome**  
Contaminant Repository for Affinity Purification  
An online database of common contaminants in AP-MS experiments

Home Experiments Protocols Define Experiment Define Protocol About Tutorial Logout

#### Add Protocol

NOTICE: Greek or other non-Latin characters/symbols

**Protocol Name \***  
enter an protocol name

**Protocol Comments**  
enter protocol comments

**Select Lab**  
ACG LAB Name

**Attributes**

Cell Line --NONE-- Controlled/Standard Vocabulary

Cell Line Subtype --NONE--

Epitope Tag --NONE--

Subcellular fractionation --NO Standard Value

Fractionation --NONE-- Standard Attribute

Affinity support 1 --NONE--

Affinity approach 2 --NONE--

Affinity support 2 --NONE--

Instrument Type --NONE--



| Current Attributes        |                                                                                                                                                    |
|---------------------------|----------------------------------------------------------------------------------------------------------------------------------------------------|
| Attribute Name            | Attribute Values                                                                                                                                   |
| Organism                  | human                                                                                                                                              |
| Cell/tissue type          | HEK293, HeLa, U2OS, PBMC, Jurkat, CEM-T, MRC-5, LS174                                                                                              |
| Cell/tissue subtype       | -, HEK293T, HEK293 Flp-In T-REx, Jurkat-Flp-In                                                                                                     |
| Drug treatment            | aphidicolin, rapamycin, nocodazole, MG132, none, IFN-beta, DMSO, okadaic acid, doxycycline+thymidine, tetracycline+thymidine, thymidine+nocodazole |
| Subcellular fractionation | total cell lysate, total lysate+chromatin, nuclear fraction, cytosolic fraction                                                                    |
| Epitope tag               | FLAG, HA, GFP, TAP, HaloTag, Strep-HA                                                                                                              |
| Control protein           | RFP, GFP, FLAG, mCherry, tag alone, untransfected, uninduced, RFP                                                                                  |
| AP steps                  | single, tandem                                                                                                                                     |
| Affinity approach 1       | M2 anti-FLAG, anti-GFP camel, anti-GFP rabbit, HA-7 anti-HA, HaloLink, IgG, Streptactin, 2xFLAG, SBP, anti-GFP mouse                               |
| Affinity support 1        | agarose, magnetic (dynabead), magnetic (agarose coated), nano-magnetic, microMACS                                                                  |
| Affinity approach 2       | -, M2 anti-FLAG, anti-GFP camel, anti-GFP rabbit, calmodulin, HA, 2xHA, HA-7 anti-HA, anti-GFP mouse                                               |
| Affinity support 2        | -, agarose, magnetic bead (dynabead), magnetic beads, agarose coated, nano-magnetic beads, microMACS                                               |
| Fractionation             | SDS-PAGE, 1D LC-MS, MudPIT, RP-RP, GeLC                                                                                                            |
| Instrument type           | Velos-Orbitrap, LTQ-Orbitrap, LTQ, LCQ, LTQ-FT, 5600 TripleTOF                                                                                     |

Figure 3.3. Currently available controlled vocabularies (Attributes)

**Biological Material**

Stable pools, HEK293. Transfection of low passage HEK293 (CRL1573) with vector using lipofectamine PLUS; selection for ~14 days with 750ug/ml active G418. Amplification of cells in 5-6 x 150mm plates; harvesting at 80-95% confluence. Harvest through scraping, followed by 3 washes with PBS. Cell pellet either frozen on dry ice and stored dry at -80C, or processed immediately.

---

**Affinity Purification**

Cells were lysed by [passive lysis assisted by freeze-thaw]. Briefly, to the frozen cell pellet, 1:4 or 1:5 pellet weight:volume ratio of lysis buffer was added. Lysis buffer was 50 mM Hepes-NaOH pH 8.0, [100 mM KCl], 2 mM EDTA, [0.1% NP40], 10% glycerol, 1 mM PMSF, 1 mM DTT and Sigma protease inhibitor cocktail, P8340, 1:500. No phosphatase inhibitors were added. Resuspended pellets were incubated on ice (or on a nutator at 4°C) for 10 min to assist lysis, then pipetted up and down to break up pellet. Tubes were frozen and thawed once (liquid nitrogen or dry ice ~5min, 37°C with agitation, then put on ice, and the lysate transferred to 2 ml Eppendorf tubes. An aliquot (20ul) was taken to monitor solubility (This aliquot was spun down, the supernatant transferred to a fresh tube, and 6 µl 4X Laemmli sample buffer added to the supernatant. The pellet was resuspended in 26 µl 2X Laemmli sample buffer). The 2 ml tubes were centrifuged at 14000 rpm for 20 min at 4°C, and the supernatant transferred to fresh 15 ml conical tubes. The protein concentration was measured (using BSA as a control). To the rest of the lysate, 25-30 µl packed [FLAG M2 agarose beads] pre-washed 4X in lysis buffer were added, and the mixture incubated 2 hours at 4°C.

---

**Peptide Preparation**

Trypsin (1 µg Sigma Trypsin Singles, T7575) dissolved in 70 µl of 50 mM ammonium bicarbonate pH 8 was added each sample. Tubes were vortexed, briefly centrifuged, and incubated at 37°C overnight. After quickly centrifuging the samples, an additional amount of trypsin (0.25 µg) was added, and the samples incubated for another 3-4 hours. The samples were acidified by adding 2 µl of 50% formic acid, and lyophilized in the speed-vac. The samples were stored at -40°C. When ready for mass spectrometry, 20 µl 5% formic acid was added to the samples and the samples were centrifuged at max speed for 10 min.

---

**LC-MS**

The ammonium bicarbonate was evaporated, and the samples were resuspended in HPLC buffer A (2% acetonitrile, 0.1% formic acid), then directly loaded onto capillary columns packed in-house with Magic 5 µm, 100Å, C18AQ. MS/MS data was acquired in data-dependent mode (over a 65min - 2 hr acetonitrile 2-40% gradient) on a ThermoFinnigan LTQ, equipped with a Proxeon NanoSource and an Agilent 1100 capillary pump.

---

**Publication Reference**

Chen et al., J Biol Chem, 2008. PMID:18715871; Chen and Gingras, Methods, 2007. PMID: 17532517; Goudreaux et al., Mol Cell Proteomics, 2009. PMID: 18782753; Kean et al., J Biol Chem., PMID: 21561862.

Figure 3.4. Creating a new CRAPome protocol / part B, adding protocol details. Add information details pertaining to the biological material (How were the cells grown and harvested? How was the recombinant protein expressed? Has a subcellular fractionation been performed?), the affinity purification step, the procedure for preparing the peptides (including fractionation at the protein or peptide level when applicable), and details of the LC-MS/MS analysis. If the Method has been published, add citations in the "Publication reference" box.

## Task 2: Link protocols to experiments

The general pipeline for the addition of experiments to the CRAPome database begins by the processing of the raw mass spectrometry files by the CRAPome administrator. The CRAPome administrator then defines the experiments with some basic information (such as the name of the spectrum file and the laboratory that deposited the data) and initiates the processing of data.

The role of the Annotator is to “edit” such experiments by linking protocols to them. To do so, the Annotator access the list of his/her experiments by selecting the “Experiments” tab at the top of the page (as in **Fig. 2.3**). Experiments which are already linked to a protocol (e.g. CC5 in **Fig. 3.4**) already have controlled vocabularies associated with them, in addition to the protocol number and protocol name. Experiments which are not yet associated are missing this information (see CC40 in **Fig. 3.4**).

To associate protocols and controlled vocabularies, select the “edit” link on the right. This will open a new window: information entered by the administrator is displayed, but not editable (please contact the CRAPome administrator to report any errors). The Annotator should change the “Experiment Status” to “Annotated” (from the default “newly added”), and link the experiment to a protocol via the drop-down menu. When the annotator selects a protocol for an experiment (see **Fig. 3.5**), all the attributes of the experiment (“controlled vocabularies”) are populated with the attributes of the protocol (see **Fig. 3.6**).

| Name | Num Preys | File Tag                                     | Protocol Number | Protocol                          | Tag  | Fractionation          | Cell Line | Affinity Supp.            |      |
|------|-----------|----------------------------------------------|-----------------|-----------------------------------|------|------------------------|-----------|---------------------------|------|
| CC40 | 486       | ACG_101027_f-GFP_G5_HU_MB2_BGB               |                 |                                   |      |                        |           |                           | edit |
| CC5  | 339       | ACG_11303_untagged_HeLa_chAP1_Orbi_11JUN2011 | 28              | HeLa Flp-In FLAG mChip Orbitra... | FLAG | total lysate+chromatin | HeLa      | magnetic (agarose coated) | edit |

**Figure 3.4. Experiments view.** Clicking on “edit” on the right enable linking a protocol to the experiment.

### Edit Experiment

Experiment ID: 40

Experiment Name \*

CC40

File Tag \*

ACG\_101027\_f-GFP\_G5\_HU\_MB2\_BGB

Constituent Files

ACG\_101027\_f-GFP\_G5\_HU\_MB2\_BGB

Admin Comments

ACG\_FLAG\_Trex293\_MAG\_9560

Select Lab

ACG

Experiment Status

newly added

Select Protocol

- No Protocol -

If there is no appropriate protocol, please **create one** before entering this experiment.

**Figure 3.5. Edit experiment view.** Data entered by the administrator is greyed out. Select a protocol to link to the experiment. Create new protocols as needed, as described above.

□ Experiment Status  
show

Select Protocol  
20-293 Flp-In FLAG mag LTQ

If there is no appropriate protocol, please **create one** before entering this experiment.

Controlled Vocabulary

|                           |                           |
|---------------------------|---------------------------|
| Organism                  | human                     |
| Cell/tissue type          | HEK293                    |
| Cell/tissue subtype       | HEK293 Flp-In T-REx       |
| Drug treatment            | none                      |
| Subcellular fractionation | total cell lysate         |
| Epitope tag               | FLAG                      |
| Control protein           | GFP                       |
| AP steps                  | single                    |
| Affinity approach 1       | M2 anti-FLAG              |
| Affinity support 1        | magnetic (agarose coated) |
| Affinity approach 2       | --                        |
| Affinity support 2        | --                        |
| Fractionation             | 1D LC-MS                  |
| Instrument type           | LTQ                       |

Figure 3.6. Controlled vocabularies are populated from the selected protocols.

### Deleting experiments and protocols:

The annotator can only define or edit new experiments (or protocols) but cannot delete them. Each newly defined experiment has an attribute called 'status' (see **Fig. 3.4**) which can be one of a) newly added, b) annotated, c) ready for release, d) show, or e) retire. If the CRAPome administrator adds a new experiment, he/she sets the status to "newly added". The annotator can change the status to "annotated", once the annotation is complete. The status is set to "ready for release" once the spectrum file(s) are processed and the database is updated. Finally, the status is set to "show" when the data is released to the end user. Only those experiments with a status "show" can be viewed by the end user. If the annotator accidentally created a wrong entry, he/she can set the status to retire. All retired experiments will be periodically purged from the database by the CRAPome administrator.

### Requesting new controlled vocabularies:

The annotator can only use pre-defined controlled vocabularies (attributes); new CVs can be requested to the CRAPome administrator.
